## Cyclophilins A and B Oppositely Regulate Renal Tubular Epithelial Phenotype

Eduard Sarró<sup>1#</sup>, Mónica Durán<sup>1</sup>, Ana Rico<sup>1</sup>, Anthony J. Croatt<sup>2</sup>, Karl A. Nath<sup>2</sup>, Salcedo Maria Teresa<sup>3</sup>, Justin H. Gundelach<sup>4</sup>, Daniel Batlle<sup>5</sup>, Richard J. Bram<sup>4,6</sup>, Anna Meseguer<sup>1,7,8#</sup>.

Affiliations: <sup>1</sup>Renal Physiopathology Group, CIBBIM-Nanomedicine, Vall d'Hebron Research Institute, Barcelona, Spain. <sup>2</sup>Division of Nephrology and Hypertension and Departments of Medicine, Mayo Clinic, Rochester, Minnesota, USA. <sup>3</sup>Department of Pathology, Hospital Universitari Vall d'Hebron, Barcelona, Spain. <sup>4</sup>Department of Pediatric and Adolescent Medicine, College of Medicine, Mayo Clinic, Rochester, Minnesota, USA. <sup>5</sup>Division of Nephrology and Hypertension, Northwestern University Feinberg School of Medicine, Chicago, Illinois, USA. <sup>6</sup>Department of Immunology, College of Medicine, Mayo Clinic, Rochester, Minnesota, USA. <sup>7</sup>Departament de Bioquímica i Biologia Molecular, Unitat de Bioquímica de Medicina, Universitat Autònoma de Barcelona, Bellaterra; Spain. <sup>8</sup>Red de Investigación Renal (REDINREN), Instituto Carlos III-FEDER, Madrid, Spain.

# Corresponding authors:

Eduard Sarró: [eduard.sarro@vhir.org](mailto:eduard.sarro@vhir.org)

Anna Meseguer: [ana.meseguer@vhir.org](mailto:ana.meseguer@vhir.org)

Renal Physiopathology Group, CIBBIM-Nanomedicine, Vall d'Hebron Research Institute, Passeig Vall d'Hebron 119-129, 08035 Barcelona, Spain.

Telephone number: +34 934894070; fax number: +34 934894015;

Running headline: CypA and B regulate epithelial phenotype

Keywords: Cyclophilins, epithelial phenotype, Slug, Snail, TGF $\beta$ , UUO, fibrosis

Character count:

1    **Abstract**

2           Cyclophilins (Cyp) are peptidyl-prolyl-isomerases and the intracellular receptors for the  
3 immunosuppressant Cyclosporine-A (CsA), which produces epithelial-mesenchymal-transition  
4 (EMT) and renal tubule-interstitial fibrosis. Since CsA inhibits Cyp enzymatic activity, we  
5 hypothesized that Cyp could be involved in EMT and fibrosis. Here, we demonstrate that CypB  
6 is a critical regulator of tubule epithelial cell plasticity on the basis that: i) CypB silencing caused  
7 epithelial differentiation in proximal tubule-derived HK-2 cells, ii) CypB silencing prevented  
8 TGF $\beta$ -induced EMT in HK-2, and iii) CypB knockdown mice exhibited reduced UUO-induced  
9 inflammation and kidney fibrosis. By contrast, silencing of CypA induces a more undifferentiated  
10 phenotype and favors TGF $\beta$  effects. EMT mediators Slug and Snail were up-regulated in CypA-  
11 silenced cells, while in CypB silencing, Slug, but not Snail, was down-regulated; thus,  
12 reinforcing the role of Slug in kidney fibrosis. CypA regulates Slug through its PPIase activity  
13 whereas CypB depends on its ER location, where interacts with calreticulin, a calcium  
14 modulator which is involved in TGF $\beta$  signaling. In conclusion, this work uncovers new roles for  
15 CypA and CypB in modulating proximal tubular cell plasticity.

## 16 Introduction

17 Kidney fibrosis is the principal process underlying the progression of chronic kidney  
18 disease (CKD) to end stage renal disease (ESRD). Since specific therapies to prevent, slow  
19 down, or reverse fibrosis are severely lacking (1), understanding the complex molecular  
20 mechanisms and cellular mediators of kidney fibrosis could offer new therapeutic avenues to  
21 prevent the loss of kidney function (2).

22 Maladaptive repair due to repeated or sustained injury to the proximal tubule epithelial  
23 cells (PTC) has proved to be sufficient to induce CKD and fibrosis (3). Injured PTC, which drive  
24 injury and inflammation by releasing pro-fibrotic factors, in particular TGF $\beta$  (4), and by  
25 producing inflammatory cytokines, including TNF $\alpha$  (5, 6), have been identified as a major player  
26 in fibrosis. A very marked and relevant feature of kidney fibrosis is the transition of tubular  
27 epithelial cells into cells with mesenchymal features, a so-called epithelial-mesenchymal  
28 transition (EMT) (7). This switch in cell differentiation and behavior is mediated by transcription  
29 factors, including Snail (Snail1), Slug (Snail2), zinc-finger E-box-binding homeobox (ZEB)1/2  
30 and Twist1/2, which negatively regulate E-cadherin expression through their recognition of  
31 common E-box sequences in the E-cadherin promoter (8, 9). Down-regulation of E-cadherin is  
32 the hallmark of EMT to reinforce the destabilization of adherens junctions in the epithelial  
33 barrier. In vivo, it has been proved that Snail is responsible for the partial EMT program (EMT2)  
34 that leads to dedifferentiation of renal epithelial cells and promotes kidney fibrosis (10, 11).  
35 Damaged epithelial cells undergoing EMT2 remain confined to the tissue without engaging in  
36 the delamination and invasion programs occurring in cancer (EMT3) (11).

37 The potent immunosuppressant Cyclosporine A (CsA) produces severe renal tubule-  
38 interstitial fibrosis that limit the drug's clinical use (12). In vitro, CsA treatment of PTC induces a  
39 dose-dependent release of TGF- $\beta$ , EMT events and increased expression of Snail (13), as well  
40 as, production of pro-inflammatory cytokines (14). Intracellularly, CsA binds to cyclophilins, a  
41 family of ubiquitous and highly conserved proteins that accelerate protein folding by catalyzing  
42 the cis-trans isomerization of proline residue (15, 16). CsA binding to cyclophilins inhibits their  
43 peptidyl-prolyl cis-trans isomerase (PPIase) activity. Cyclophilins do also play a prominent role  
44 as chaperones by mediating protein trafficking, protein-protein interactions, and as scaffolding

45 proteins for assembly of macromolecular complexes (17). In humans, cyclophilins A (CypA) and  
46 B (CypB), the best characterized members of the family, are located in the cytosol and in the  
47 endoplasmic reticulum (ER), respectively (17). CypB controls ER homeostasis by participating  
48 in the protein quality control process in the ER (18) and is released to the extracellular media in  
49 the presence of CsA (19). Moreover, CypA and CypB can also be released in response to  
50 inflammatory stimuli and elevated circulating levels for both of them have been reported in  
51 different inflammatory diseases (20–22). They contribute to the inflammatory responses via their  
52 potent chemotactic properties for various immune cells (23, 24), which is mediated by the  
53 signaling receptor CD147 on target cells (25). In the kidney, CypB was found to be the  
54 interacting partner of KAP, a protein exclusively expressed in proximal tubule cells of the kidney  
55 that protects against CsA toxicity (26, 27), as well as interacting with sodium-potassium  
56 ATPase, being required for pump activity in proximal tubule cells of the kidney (28).

57         Considering the loss of epithelial phenotype triggered by CsA and its inhibitory actions  
58 on cyclophilins, the idea that the latest could be critical in the development of EMT and kidney  
59 fibrosis is entirely plausible. To investigate the potential involvement of cyclophilins in the  
60 regulation of the epithelial phenotype, we studied the effects of CypA and CypB silencing in  
61 human proximal tubule epithelial cells. We observed that CypA and CypB silencing exert  
62 opposite effects on the phenotype of proximal tubular cells by promoting or haltering,  
63 respectively, EMT processes through distinctly modulating the Snail family of epithelial  
64 repressors. Moreover, we also showed a marked attenuation of the molecular changes  
65 associated with inflammation and fibrosis in the kidneys of CypB KO mice subjected to  
66 unilateral ureteral obstruction (UUO). Results from this study pinpoint CypB as a potential  
67 therapeutic target to prevent fibrosis.



## 68 **Results**

### 69 **CypB and CypA silencing differentially affects epithelial phenotype of cultured** 70 **PTC**

71 To investigate the potential involvement of cyclophilins in the regulation of the epithelial  
72 phenotype, we silenced CypA and CypB in HK-2 cells, a widely characterized proximal tubular  
73 epithelial cell line retaining a phenotype indicative of well-differentiated PTC (Fig. 1A). Since  
74 PTC in culture progressively acquire epithelial features upon reaching confluence, we first  
75 analyzed the expression levels of the epithelial markers E-cadherin (adherens junctions), ZO-1  
76 and occludin (tight junctions) and keratin (intermediate filaments) at 2, 5 and 10 days post  
77 seeding, considering that cells reach confluence by the second day. We observed that all  
78 epithelial markers increased along days of culture (Fig. 1B). Five days post seeding was  
79 selected for further experiments. Our results show that CypB silencing greatly increased E-  
80 cadherin and occludin expression and to a lesser extent ZO-1 and keratin (Fig. 1C). By contrast  
81 CypA silencing reduced occludin, ZO-1 and keratin levels. Those results were also observed at  
82 the mRNA level (Fig. 1D). As shown in Figure 1E, the increase in E-cadherin expression  
83 observed in CypB-silenced cells correlated with augmented E-cadherin levels in the plasma  
84 membrane, suggesting a concomitant gain in E-cadherin functionality. Since a stimulatory role  
85 for E-cadherin in proliferation has been described (29), we explored the effect of CypB  
86 knockdown on HK-2 proliferation. In accordance with E-cadherin levels, cells lacking CypB  
87 showed higher proliferation indices than control cells, whereas CypA silencing had no significant  
88 effect (Fig 1F). By contrast, we observed that CypA silencing reduced transepithelial electric  
89 resistance (TER) and increased FITC-labeled Dextran permeability (Fig. 1G and 1H,  
90 respectively), which correlated with the downregulation in ZO-1 and occludin levels observed in  
91 CypA-silenced cells.

92 To further characterize the effects of cyclophilin silencing in epithelial differentiation, we  
93 analyzed the activities of the proximal tubule brush border enzymes alkaline phosphatase (AP),  
94 dipeptidyl peptidase-IV (DPP-IV) and gamma-glutamyltransferase (GGT) as recognized  
95 markers of epithelial differentiation. Aligned with the above results, AP activity was markedly  
96 enhanced in cells lacking CypB, with maximal levels already achieved after two days of culture

97 (Fig. 1I). By contrast, DPPIV activity stayed below control levels (Fig. 1J) and GGT activity  
98 behaved as in controls (Fig. 1K). Diminished DPPIV activity might not be detrimental to the  
99 renal epithelial cells phenotype since it has been reported that DPPIV inhibitors block TGF $\beta$   
100 signaling, thus protecting against renal fibrosis (30, 31). In CypA-silenced cells AP activity  
101 remained permanently low (Fig. 1I), DPPIV activity behaved as in control cells (Fig. 1J) and  
102 GGT activity increased over time but remained below control levels (Fig. 1K).

103         The temporal expression pattern of epithelial markers is tightly regulated by epithelial  
104 repressors, including the transcription factors Snail (Snail1), Slug (Snail2), zinc-finger E-box-  
105 binding homeobox (ZEB)1/2, and Twist1/2 (8, 9). Our results show that in HK-2 cells CypA  
106 silencing increased Slug mRNA levels and to a lesser extent those of Snail (Fig. 1L).  
107 Interestingly, CypB silencing also slightly increased the mRNA levels of Snail, but strongly  
108 reduced those of Slug (Fig. 1L). By contrast, neither CypA nor CypB silencing had any  
109 significant effect on Twist1 and Zeb1 mRNA levels (Fig. 1L). To corroborate these results, we  
110 analyzed the protein levels of Slug and Snail. Our results show that Slug and Snail expression  
111 progressively decreased from day 2 to 10 (Fig. 1M), correlating with the augmented epithelial  
112 marker expression observed in Figure 1B. Moreover, at 5 days post-seeding, we observed that  
113 Slug protein levels were increased in CypA-silenced cells while they were undetectable in  
114 CypB-silenced cells (Fig. 1N). Both CypA and CypB increased Snail protein levels to a higher  
115 extent than that observed at the mRNA level, suggesting additional regulatory mechanisms  
116 besides transcriptional modulation (Fig. 1N).

117         In order to corroborate these results, we silenced CypB and CypA in another proximal  
118 tubule derived cell line (RPTEC) (Fig S1). Our results show that, as in HK-2 cells, RPTEC cells  
119 lacking CypB presented reduced slug expression and higher Snail levels. E-cadherin  
120 upregulation in CypB silenced cells was less appreciable in RPTEC cells, mostly due to the  
121 higher basal expression of this protein in comparison with HK-2 cells.

122         Taken together, these results indicate that while CypB is necessary for Slug expression,  
123 CypA acts as a repressor of both Slug and Snail. Moreover, our results also indicate that, at  
124 least in CypB-silenced cells, loss of Slug rather than gain of Snail prevail in the regulation of  
125 epithelial markers.

126

127 **Cyclophilin A and B exert divergent effects on TGF $\beta$  action on epithelial cells**

128 TGF $\beta$  has been widely regarded as a primary factor driving renal fibrosis (4). In vitro,  
129 TGF $\beta$  treatment alone can induce proximal tubule cells to undergo an epithelial-to-  
130 mesenchymal transition (EMT) (4, 32). Considering the results shown in Figure 1, we decided to  
131 investigate the effects of CypB and CypA silencing on TGF $\beta$  signaling. In HK-2 cells, TGF $\beta$   
132 induced an EMT-like process demonstrated by a gradual decrease of E-cadherin and occludin  
133 expression and an increase of Fibronectin levels that were not related with changes in CypA or  
134 CypB levels (Fig. 2A). Reminiscent of what happens in basal conditions, it is of note that CypB  
135 silencing partially prevented TGF $\beta$ -induced EMT by maintaining E-cadherin and occludin levels  
136 closer to control and reducing fibronectin expression (Fig. 2B). In addition, CypA silencing  
137 enhanced TGF $\beta$ -induced EMT by further decreasing E-cadherin and occludin levels and  
138 increasing those of fibronectin. Loss of E-cadherin and occludin expression after TGF $\beta$   
139 treatment was consistent with a switch from a well defined monolayer with cobblestone  
140 morphology of control cells to formation of cell aggregates containing a combination of poorly-  
141 interconnected rounded cells and spindle-shaped cells with filopodia (shCon panels of Fig. 2C)  
142 and increased cell-to-substrate adhesiveness (shCon bar of Fig. 2D) in treated control cells.  
143 Silencing of CypB almost completely prevented TGF $\beta$ -induced morphological changes (Fig. 2C)  
144 and strongly hampered the increase cell-to-substrate adhesion induced by TGF $\beta$  treatment,  
145 while CypA silencing had no effect (Fig. 2D).

146 TGF $\beta$  signaling to Slug and Snail is canonically transduced by Smad proteins.  
147 Accordingly, we analyzed whether the distinct phenotypical changes observed in TGF $\beta$ -treated  
148 CypA and CypB-silenced cells could be related to Smad-dependent regulation of Slug and Snail  
149 levels. Treatment of HK-2 cells with TGF $\beta$  induced a time-dependent expression of Slug and  
150 Snail that was preceded by Smad2/3 activation (Fig. 2E). Silencing of CypB prevented TGF $\beta$ -  
151 induced slug expression and enhanced Snail expression, while silencing of CypA increased  
152 both Slug and Snail levels (Fig. 2F left). Again, these results support a predominant effect of  
153 Slug downregulation over Snail upregulation in the TGF $\beta$ -induced morphological changes  
154 observed in CypB-silenced cells. Interestingly, cyclophilin modulation of Slug and Snail occurred

155 without changes in TGF $\beta$ -induced phosphorylation of Smad2/3 or in the expression levels of  
156 Smad4. Although to a lesser extent, these changes were also observed at the transcriptional  
157 level (Fig. 2F right). Slug and Snail proteins have a rapid turnover that is regulated by ubiquitin-  
158 mediated proteasomal degradation. To further demonstrate that CypB silencing diminished Slug  
159 expression primarily through transcriptional effects, cells were pre-treated with the proteasome  
160 inhibitor MG132 before treatment with TGF $\beta$ . As depicted in Figure 2G, treatment with MG132  
161 alone increased Slug levels well over those of TGF $\beta$  induction. This increase was clearly  
162 reduced in CypB silenced cells, an effect even more evident after TGF $\beta$  induction, supporting  
163 the concept that CypB modulates Slug at the mRNA level.

164 In addition to phosphorylation, TGF $\beta$ -induced Smad2/3 signaling is also regulated by  
165 other mechanisms such as nuclear translocation or through the action of inhibitory Smad7 and  
166 Smad6, which negatively regulate TGF $\beta$  signaling by establishing an autoregulatory negative  
167 feedback loop (33). First we analyzed Smad3 and Smad2 translocation to the nucleus in CypB  
168 and CypA-silenced cells after TGF $\beta$  treatment (Figure 2H). Our results showed that neither  
169 CypB nor CypA silencing affected TGF $\beta$ -induced Smad2/3 translocation. We next analyzed the  
170 expression levels of Smad7 and 6, and of Snon, a transcriptional repressor of Smad2/3  
171 regulated genes. As shown in Figure 2I, Smad7, Smad6, and Snon levels were transcriptionally  
172 induced by TGF $\beta$  treatment. Interestingly, all three genes were upregulated in CypB-silenced  
173 cells in both untreated and TGF $\beta$  treated cells and slightly reduced in CypA-silenced cells after  
174 TGF $\beta$  treatment.

175 In order to explore the mechanisms by which CypB regulates inhibitory Smads, we  
176 analyzed the levels of BMPs 2 and 7, which counteract TGF $\beta$ -induced EMT in a Smad  
177 dependent way. We were unable to detect BMP7 mRNA in HK2 cells despite the use of multiple  
178 different probes. By contrast, we detected BMP2, which was upregulated in CypB silenced cells  
179 (Fig. 2I).

180

181 **Slug modulation by CypB is independent of the CD147 receptor and extracellular**  
182 **CypB.**

183 Proximal tubular cells (PTC) actively contribute to the production of inflammatory  
184 mediators (5, 34, 35), thereby participating to dynamic interplay between fibrosis and  
185 inflammation. It has also been reported that NF $\kappa$ B, which plays a key role in inflammation,  
186 upregulates Snail both at the transcriptional level and stabilizing Snail protein (36). We  
187 hypothesized a putative role of cyclophilins on these processes and analyzed the promoter  
188 activity of NF $\kappa$ B in CypA and CypB silenced cells in basal conditions and upon activation by  
189 cotransfection with p65 subunit. Our results show no significant differences in NF $\kappa$ B promoter  
190 activity between control and silenced cells in basal conditions (Fig. 3A). However, when NF $\kappa$ B  
191 was activated by p65 cotransfection, we observed that the promoter activity was strongly  
192 increased in CypA-silenced cells and considerably decreased in CypB-silenced cells.

193 Because it has been described a role for extracellular cyclophilins in inflammation (37),  
194 we next aimed to explore whether cyclophilin regulation of Slug and Snail levels could be  
195 related to modulation of this inflammatory pathway in an autocrine manner. Figure 3B shows  
196 that both CypB and CypA were progressively secreted into the media of HK-2 cells and that  
197 secretion was unaffected by TGF $\beta$  treatment. To explore whether extracellular CypB could be  
198 supporting Slug expression, we blocked CypB secretion with Brefeldin-A (Bf-A) to inhibit protein  
199 transport from the endoplasmic reticulum to the Golgi apparatus as well as with Cyclosporine-A  
200 (CsA) to further induce CypB secretion. Our results show that Bf-A blocked both basal and CsA-  
201 induced CypB secretion (Fig. 3C). By contrast, neither CsA nor Bf-A had any effect on CypA  
202 secretion. This shows that CypA and CypB are secreted to the extracellular media through  
203 different mechanisms. Bf-A pre-treatment prevented basal and TGF $\beta$ -induced Slug expression  
204 (Fig. 3D) but, contrarily than CypB silencing, also reduced Snail expression and Smad3 and  
205 Smad2 activation. To further explore the involvement of extracellular cyclophilins, we knocked  
206 down CD147, which is, to our knowledge, the only known receptor for extracellular CypB and  
207 CypA. Our results show that CD147 silencing increased, rather than decreased, Slug and Snail  
208 levels, thereby resembling our findings in CypA but not in CypB-silenced cells (Fig. 3E). Finally,  
209 and to further investigate whether extracellular CypB could be modulating Slug levels in a  
210 CD147 independent manner, CypB-silenced cells were treated with increasing doses of  
211 recombinant CypB. Our results show that exogenous CypB was unable to restore Slug  
212 expression or downregulate Snail levels to levels of non-silenced cells (Fig. 3F). ERK1/2

213 phosphorylation was used as a control of CypB treatment effectiveness (38). Taken together  
214 these results argue against and autocrine loop in Slug modulation by CypB.

215

## 216 **Slug regulation by CypA and CypB depends on PPlase activity of CypA and ER** 217 **location of CypB**

218 To further investigate the mechanisms underlying modulation of Slug and Snail  
219 expression by CypB and CypA, we re-introduced mutated forms of CypB and CypA lacking  
220 PPlase activity or, in the case of CypB, its N-terminal signal peptide, in the corresponding  
221 silenced-cells (Fig. 4A). To do so, we first generated a shRNA-resistant wild-type CypB (wt  
222 CypB) by introducing silent mutations into the shRNA-targeted sequence for CypB to allow its  
223 escape from degradation by the RISC complex. ShRNA against CypA was directed to the  
224 3'UTR, and thus reintroduction of a wild-type form of CypA (wt CypA) did not require any further  
225 modification. Re-introduction of the wt forms served as rescue experiments to validate that the  
226 effects observed in silenced cells were not due to off-targets effects. Over these constructs, we  
227 mutated critical residues for PPlase activity ( $\Delta$ PPI mutants) in both CypB (R62A) and CypA  
228 (R55A), and separately deleted the signal peptide ( $\Delta$ (K2\_A25)) directing CypB to the  
229 endoplasmic reticulum ( $\Delta$ ER mutant). Finally, an HA-tag was added at the C-terminus of each  
230 cDNA. All these constructs were stably transduced into cyclophilin-silenced cells using lentiviral  
231 particles and selected with a different antibiotic than the one used for silencing selection.  
232 Western blot assays demonstrated that the wild-type and the mutant forms of both CypA and  
233 CypB were successfully reintroduced in the corresponding silenced cells (Fig. 4B and 4E,  
234 respectively). Moreover, by using confocal IF we observed that both wt and  $\Delta$ PPI forms of CypB  
235 staining correlated with ER location, as determined by the ER transmembrane protein calnexin  
236 (CNX), and were successfully secreted to the extracellular medium (Fig. 4F and 4E, SN panel),  
237 while CypB  $\Delta$ ER did not (Fig. 4F and 4E, SN panel).

238 As shown in Figure 4C, reintroduction of wt CypA into CypA-silenced cells decreased  
239 Slug and Snail levels to those of control cells, while reintroduction of the  $\Delta$ PPI mutant of CypA  
240 failed to do so, indicating that the PPlase activity of CypA is necessary to maintain Slug and  
241 Snail at basal levels. These results were also observed in the presence of TGF $\beta$  (Fig. 4D). On

242 the other hand, reintroduction of CypB-wt into CypB-silenced cells increased Slug levels almost  
243 to control levels while that of the  $\Delta$ PPI mutant not only rescued but increased Slug levels over  
244 those of control cells (Fig. 4G). Finally, reintroduction of the  $\Delta$ ER mutant failed to restore Slug  
245 levels. Again, these effects were observed in the presence of TGF $\beta$  (Fig. 4H). These results  
246 reinforce the idea that CypB is required for Slug expression and that its presence in the ER but  
247 not its PPIase activity is required for this effect.

248

### 249 **CypB modulates Slug levels through calcium regulating elements in the ER**

250 As shown above, ER location of CypB is mandatory for Slug expression. Since it has  
251 been previously described that CypB interacts with the calcium-related ER chaperones  
252 calreticulin (CRT) and calnexin (CNX) (39), and CRT has been involved in the regulation of Slug  
253 expression (40–42), we analyzed whether the modulatory effects of CypB on Slug levels could  
254 be related to changes in CRT/CNX localization or altered interaction with these chaperones.  
255 Figure 5A shows that CRT and CNX colocalized discretely, fitting with their ER luminal and  
256 transmembrane location, respectively. We also observed that localization of CRT and CNX was  
257 unaffected by either CypA or CypB silencing. Next, wild type, PPIase and signal peptide  
258 defective mutants of CypB were re-introduced in CypB-silenced cells and immunoprecipitated  
259 with HA antibody. As shown in Figure 5B, CRT immunoprecipitated with CypB wt and to a  
260 higher extent with CypB  $\Delta$ PPI but no interaction was detected with the CypB  $\Delta$ ER mutant.  
261 Interestingly, this interaction pattern paralleled that of Slug expression shown in Figure 4G. By  
262 contrast, we detected CNX interaction with the CypB  $\Delta$ ER mutant but not with the wt form.  
263 Although a strong interaction of CNX with CypB  $\Delta$ PPI was also observed, it is worth mentioning  
264 that CNX levels were increased in CypB  $\Delta$ PPI cell extracts (input). Taken together these results  
265 suggest that a CypB-CRT complex rather than a CypB-CNX complex could be mandatory for  
266 CypB regulation of Slug. They also indicate that interaction with either CRT or CNX depends on  
267 CypB location.

268 CRT is an important ER calcium buffering protein involved in regulating ER calcium  
269 storage and release. To ascertain if Slug downregulation in CypB silenced cells could be due to  
270 ER-related calcium signaling, we analyzed whether Slug and Snail levels were modulated by



271 alterations of ER calcium stores. ER calcium pools were depleted by exposing cells to  
272 thapsigargin or ionomycin (Fig. 5C). Our results show that basal Slug levels were increased by  
273 ionomycin but suppressed by thapsigargin, while Snail levels were downregulated by both.  
274 These effects were also observed in the presence of TGF $\beta$  (Fig. 5D). Interestingly, ionomycin  
275 was unable to induce Slug expression in CypB-silenced cells, and the ionomycin-induced  
276 decrease of Snail levels was only partially attenuated in both CypB and CypA-silenced cells.  
277 These changes occurred independently of ionomycin-induced ERK activation. Taken together  
278 these results suggest that CypB could be regulating Slug levels through ER calcium-related  
279 events.

280

### 281 **CypB depletion ameliorates inflammation and fibrosis after UUO**

282 To expand on the results performed in vitro and to assess the potential contribution of  
283 CypB in the development of fibrosis, global CypB-KO mice and wild-type (wt) littermates (Fig.  
284 6A) were subjected to unilateral ureteral obstruction (UUO) of the left kidney for one-week  
285 period to mimic the pathological conditions underlying early events in renal fibrosis (Fig. 6B).  
286 Controls corresponded to contralateral (non-ligated) right kidneys from the same mice. Our  
287 results show that while no apparent differences were observed between the non-ligated kidneys  
288 from wt and CypB KO mice regarding overall kidney morphology (HE), inflammation (F4/80) and  
289 collagen deposition (MT), we found that obstructed kidneys from CypB KO mice were protected  
290 from the tubular distension, inflammation and fibrosis observed in wt mice under UUO (Fig. 6C).  
291 Sham-operated mice were also included and results were the same as those found in non-  
292 ligated kidneys (not shown). These results suggest that CypB deficiency is associated to  
293 reduced UUO-induced kidney fibrosis.

294 Since UUO induces a robust inflammatory response we compared the levels of pro-  
295 inflammatory cytokines present in obstructed kidneys of wt and CypB KO mice (Fig. 6D). We  
296 found that in wt mice the levels of tumor necrosis factor  $\alpha$  (TNF- $\alpha$ ), macrophage chemo-  
297 attracting protein 1 (MCP-1) and the pan-macrophage marker CD68 were strongly up-regulated  
298 in the obstructed kidneys in comparison to the right contralateral kidneys. This increase was  
299 significantly reduced in the kidneys of CypB KO mice. In non-obstructed kidneys, there were no



300 differences in the expression of these inflammatory markers between wt and CypB KO mice. In  
301 accordance with the protein levels shown in Figure 6A, CypB mRNA levels were almost  
302 undetectable in CypB KO mice and were not affected by the UUO (Figure 6D). We also  
303 observed that the genetic deletion of CypB prevented the down-regulation of CypA induced by  
304 UUO.

305         To further investigate the effects of CypB deletion in kidney fibrosis we analyzed the  
306 levels of fibrosis and EMT related genes. In obstructed kidneys of wt mice, we observed a  
307 potent and significant increase in the expression levels of ECM components fibronectin and  
308 collagen-Ia and the metalloproteinase MMP-9, as well as of TGF $\beta$ . We also observed a  
309 significant reduction of E-cadherin and CD147 mRNA levels in comparison with those found in  
310 the contralateral kidneys (Fig. 6E). Our results show that genetic deletion of CypB significantly  
311 prevented the UUO-induced increase of fibronectin and MMP-9 and the decrease of E-cadherin  
312 and CD-147 observed in wt mice. However, we didn't observe significant differences in TGF $\beta$   
313 levels between wt and CypB KO mice that could explain the aforementioned protective effects  
314 of CypB knockdown. To gain further insights into the mechanism of action of CypB, we next  
315 investigated the levels of the TGF $\beta$  downstream mediators Snail and Slug, and the levels of the  
316 antifibrotic factors SMAD7, BMP7 and BMP6, which counteract the TGF $\beta$  pathway. Kidney  
317 obstruction increased the levels of Slug, Snail, SMAD7 and BMP6 while reduced those of BMP-  
318 7 (Fig. 6E). CypB knockdown reduced Slug levels both in contralateral and obstructed kidneys,  
319 while increased those of Snail only after UUO. CypB KO mice also show a reduced decrease  
320 and an augmented increase in BMP7 and BMP-6, respectively, after UUO. Finally, we also  
321 observed that SMAD7 levels were upregulated in non-ligated kidneys of CypB KO mice.

322         These results, together with those found in HK-2 cells, indicate the association of CypB  
323 deficiency and a lower fibrotic and inflammatory response after UUO and suggest a potential  
324 role of CypB on EMT processes.

## 325 Discussion

326 It is increasingly accepted that after sustained kidney injury, tubular epithelial cells  
327 undergo a partial EMT or type 2 EMT, which contributes to kidney fibrosis. This process  
328 appears to be plastic, where cells are not engaged in an unidirectional process or locked into  
329 one differentiated state, but eventually transit back to the epithelial phenotype (43). Accordingly,  
330 the identification of factors regulating this epithelial plasticity could improve the understanding of  
331 kidney fibrosis. In the present work, we demonstrate for the first time that CypB is a critical  
332 regulator of tubule epithelial cell plasticity on the basis that: i) CypB silencing caused epithelial  
333 differentiation in the proximal tubule-derived cell line HK-2, ii) CypB silencing prevented TGF $\beta$ -  
334 induced EMT in HK-2 cells, and iii) Global CypB knockdown is associated to a reduced UUU-  
335 induced kidney fibrosis. Interestingly, silencing of CypA in HK-2 cells exerted almost  
336 diametrically opposite effects on epithelial cells than CypB silencing. All these effects most likely  
337 result from CypB and CypA regulation of the transcriptional repressor Slug and Snail.

338 It is becoming increasingly evident that the role of cyclophilins is not restricted to protein  
339 folding and that they are also involved in multiple cellular processes such as cell division,  
340 protein trafficking, cell signaling, transcriptional regulation and stress tolerance among others  
341 (44). Results presented in this study show that in a global CypB knockdown the levels of  
342 inflammation and fibrosis mediators were reduced and that the loss of E-cadherin in mouse  
343 obstructed kidneys was prevented. Since a pro-inflammatory role of extracellular CypB has  
344 been described (45), it could not be discarded that the protective effects of CypB knockdown on  
345 kidney fibrosis were secondary to a reduction in inflammation. Our results in HK-2 cells not only  
346 support a direct effect of CypB silencing on promoting epithelial phenotype but also in reducing  
347 inflammation through NF $\kappa$ B inhibition. Altogether, our results suggest that the gain of epithelial  
348 markers observed in CypB silenced proximal tubule cells might resemble the mesenchymal to  
349 epithelial (MET) transition undergone by surviving tubule cells upon injury, thus promoting the  
350 functional and histological features that would return the kidney to normal function. Accordingly,  
351 it could be expected that CypB overexpression recapitulated events driving to a more de-  
352 differentiated phenotype. Actually, it has been described that CypB overexpression is related to  
353 malignant progression in several types of tumors including breast cancer, hepatocellular  
354 carcinoma, gastric tumors and malignant gliomas (46–49). Contrarily to the effects caused by

355 CypB silencing, knockdown of CypA induced a more undifferentiated phenotype regarding the  
356 molecular and functional epithelial markers studied. These results are in agreement with  
357 previous studies showing loss of cell-cell contacts and increased fibronectin expression after  
358 CypA-silencing of human renal epithelial cells from nephrectomy specimens (50). Considering  
359 the above phenotypical consequences of CypA silencing in cultured cells, the reduction in CypA  
360 levels observed in mouse kidneys after ureteral obstruction could be relevant for the  
361 development of fibrosis. In this sense, the increased levels of CypA in injured kidneys of CypB  
362 KO mice may respond to a physiological compensatory mechanism. In summary, results  
363 obtained in both, CypB KO mice and in cultured proximal tubule cells demonstrate a role for  
364 CypA and CypB in epithelial plasticity and homeostasis; while CypB would foster a more  
365 dedifferentiated state, CypA would preserve the epithelial phenotype.

366         These striking opposite actions of CypB and CypA silencing on the HK-2 epithelial  
367 phenotype revealed, for the first time, a differential regulation of Snail and Slug transcriptional  
368 repressors by these cyclophilins. Specifically, CypA-silenced cells showed upregulated levels of  
369 both Snail and Slug while CypB-silencing strongly downregulated Slug and upregulated Snail;  
370 thereby indicating that while CypB represses Snail but is required for Slug expression, CypA  
371 acts as a repressor of both Slug and Snail proteins. Moreover, we can conclude that, at least in  
372 CypB silenced cells, loss of Slug drives the epithelial cell phenotype in spite of increased Snail  
373 levels. In this sense, and despite their high homology in their DNA binding and SNAG domains,  
374 Snail and Slug present common and nonequivalent functions in epithelial promoter repression,  
375 DNA binding and EMT-inducing ability (51). This predominant role of Slug is also particularly  
376 relevant since Snail has been getting most of the attention and considered as a sufficient and  
377 necessary factor to induce EMT and fibrosis in mouse kidney (11).

378         Snail and Slug are considered the master-regulators of TGF $\beta$ -induced EMT and kidney  
379 fibrosis. In cultured proximal tubular cells, including HK-2, treatment with TGF $\beta$  is enough to  
380 induce Slug and Snail and trigger EMT. Consistent with our results in untreated cells, CypB  
381 silencing prevented TGF $\beta$ -induced Slug expression and its profibrotic effects, while CypA  
382 silencing enhanced them. TGF $\beta$  regulates renal fibrosis positively by receptor regulated R-  
383 Smads (Smad2/3), but negatively by inhibitory I-Smads (Smad6/7) which are transcriptionally  
384 induced by TGF $\beta$  establishing an important negative feedback loop. In this sense, blockade of

385 TGF $\beta$  signaling by Smad7 gene therapy is known to prevent experimental renal fibrosis (52).  
386 Interestingly, it is worth noticing that, from the gene panel analyzed, Smad7 and Slug were the  
387 only genes differentially expressed in non-ligated kidneys of CypB KO in comparison with wt  
388 mice; where Smad7 mRNA overexpression was associated with Slug down-regulation. In  
389 agreement with that, we found that in TGF $\beta$  treated HK-2 cells, Smad7 and also Smad6  
390 expression was upregulated in CypB-silenced cells. I-Smads antagonize TGF- $\beta$  signaling  
391 through multiple negative feedback mechanisms that include: i) formation of Smad7 stable  
392 complexes with activated type I TGF $\beta$  receptor ALK5/T $\beta$ RI which blocks the phosphorylation of  
393 R-Smads and subsequent nuclear translocation of R-Smad/Smad4 heterocomplexes; ii) by  
394 recruiting ubiquitin E3 ligases, such as Smurf1/2, resulting in the ubiquitination and degradation  
395 of T $\beta$ RI and iii) in the nucleus, by interfering with the formation of the functional R-  
396 Smad/Smad4-DNA complex on target gene promoters (53). On this basis and considering that  
397 CypA and CypB silencing modulate Slug and Snail levels upon TGF $\beta$  treatment without  
398 changes in either Smad2/3 phosphorylation or nuclear translocation, our results would suggest  
399 a direct inhibitory effect of Smad7 over Slug promoter in CypB-silenced cells. This mechanism  
400 seems to be specific for Slug promoter, since it is not affecting Snail expression. Besides TGF $\beta$ ,  
401 Smad7 expression is also regulated by BMPs. BMPs further counteract TGF $\beta$  pathway through  
402 other mechanisms such as control of Snon expression, which represses TGF $\beta$  signaling by  
403 inactivating Smad transcriptional complexes. Considering that levels of BMP7 and 6 in CypB  
404 KO mice and BMP-2 and Snon in CypB-silenced HK-2 cells were upregulated, and that CypB  
405 knockdown had no significant effect on UUO-induced TGF $\beta$  levels, our results suggest that lack  
406 of CypB would impact Slug expression by counteracting, rather than hampering, TGF $\beta$   
407 signaling.

408 Mechanistically, both CypA and CypB seem to be acting on Slug and Snail through  
409 different mechanisms. Thus, while the PPIase activity of CypA is required to keep both Slug and  
410 Snail downregulated, the presence of CypB signal peptide, but not its PPIase activity, is  
411 mandatory to allow slug expression. These results fit with a previous report showing that CypA,  
412 through its PPIase activity, participates in epithelial differentiation of kidney intercalated cells by  
413 mediating matrix assembly of the extracellular matrix protein hensin (54). The involvement of the  
414 PPIase activity of CypA in the maintenance of epithelial phenotype was also supported by the

415 fact that, although cyclosporine-A (CsA) inhibits the PPIase activity of both CypB and CypA,  
416 silencing of CypA, rather than that of CypB, mimics the CsA-induced phenotypic changes  
417 previously described on proximal tubular cells (13), pointing to CypA as the main target of CsA  
418 effects. Regarding CypB, the involvement of its signal peptide on slug expression might either  
419 require progression through the secretory pathway ultimately leading to secretion, or the need  
420 for CypB localization within the ER. Considering the aforementioned extracellular role of  
421 cyclophilins, the existence of a cyclophilin autocrine signaling loop affecting slug expression  
422 could not be discarded. Nevertheless, our results argue against an extracellular role of CypB in  
423 modulating slug since: i) no differences in either CypB or CypA secretion were observed after  
424 TGF $\beta$  treatment; ii) silencing of CD147, the only known receptor for extracellular cyclophilins,  
425 did not prevent but rather increase slug expression; and iii) exogenously added recombinant  
426 CypB was unable to restore slug levels. It is worth mentioning that the effects of CD147  
427 silencing on Slug expression resembled those of CypA silencing, suggesting that, at least for  
428 CypA, an extracellular loop could be involved in CypA regulation of Slug and Snail. In  
429 accordance with this, it has been previously described that CypA acts as a survival-enhancing  
430 autocrine factor in mouse ESC cultures (55). Moreover, it has been reported that extracellular  
431 CypA activates the SMAD pathway and promotes inflammation in biliary atresia and that  
432 targeting this extracellular CypA ameliorates disease progression (56).

433 From the aforementioned results we conclude that CypB would be mediating Slug  
434 expression by means of its non-catalytic chaperone role within the ER. From the initial discovery  
435 of CypB interaction with CAML (calcium-signal modulated cyclophilin ligand) (57), novel CypB  
436 partners have been identified, including the sodium-potassium ATPase (58) and the human  
437 TRPV6 calcium channel protein (59) among others. In addition, CypB participates in  
438 macromolecular chaperones complexes in the ER lumen together with the ERp72, CRT, CNX,  
439 BiP (GRP78) and GRP94 (60, 61), and the lectin chaperones calnexin (CNX) and calreticulin  
440 (CRT) (39). The latest are of special interest because their involvement in calcium signaling and  
441 to previous reports indicating that CRT was required for TGF $\beta$ -induced EMT (41, 42, 62–64).  
442 The biological and functional relevance of CypB interaction with CRT and CNX has not been  
443 still elucidated. Our results show that in HK-2 cells, CypB preferentially interacts with CRT since  
444 no interaction with CNX was observed under control conditions. Interestingly, CypB-CRT

445 interaction was increased when the PPIase activity of CypB was muted, and was totally  
446 prevented when CypB was not present in the ER, closely paralleling that observed in Slug  
447 expression and therefore suggesting a potential role of CypB-CRT interaction in Slug regulation.  
448 According to the literature, and as we observed in CypB-silenced cells, CRT seem to be  
449 preferentially acting over Slug, since CRT over expression in kidney epithelial MDCK cells (40)  
450 or HK-2 cells (42), resulted in Slug upregulation without apparent (40), or much more reduced  
451 (42), changes in Snail levels. Moreover, as occurred in CypB silenced HK-2 cells, CRT  
452 depletion does not impact canonical TGF $\beta$  signaling as TGF $\beta$  was still able to stimulate Smad  
453 activity in CRT -/- MEFs (63). On the other hand, interaction of CypB with CNX was only  
454 detected when CypB has its PPIase activity mutated or when CypB was unable to enter the ER.  
455 CypB interacts with CRT and CNX through their P-domain, and complex formation is not  
456 affected by CsA, confirming the functional independence of the P-domain binding and PPIase  
457 activity (65). We hypothesize that, since CypB interaction with other partners might require  
458 intact PPIase residues, CRT/CNX interaction with  $\Delta$ PPI CypB would benefit from a larger pool  
459 of unbound CypB. Nevertheless, interaction of CNX with  $\Delta$ ER CypB remains to be explained  
460 considering that CNX is an integral ER transmembrane protein and that the p-domain  
461 containing CypB interaction sites faces the lumen of the ER. Considering our results and  
462 previous data on the literature, it is entirely plausible that CypB could be modulating Slug  
463 expression through its interaction with CRT.

464 It has been described that CRT mediates TGF $\beta$ -dependent transcriptional responses  
465 through its role as a calcium signaling regulator, rather than through its chaperone/UPR function  
466 (64). In this sense, cells lacking CRT have impaired calcium release from the ER (64),  
467 suggesting that calcium release could be a key factor in Slug modulation. However, our results  
468 suggest that an increase in cytosolic calcium levels *per se* is not determinant in slug modulation,  
469 since treatment with ionomycin or thapsigargin (Tg), which both ultimately lead to increased  
470 cytosolic calcium, exerted opposite effects on Slug levels, by either increasing or decreasing  
471 them, respectively. Thus, it is likely that a more specific calcium event within the ER underlies  
472 Slug modulation by CypB. Similar results were obtained by Zimmerman et al. (63), showing that  
473 TGF $\beta$  treatment in the presence of ionomycin, despite an increase in cytoplasmic calcium, was  
474 still unable to increase ECM transcript in CRT-deficient cells. Results from these authors

475 suggested that, although CRT-mediated calcium regulation is a critical factor for TGF $\beta$ -induced  
476 ECM stimulation, calcium itself is not sufficient, and other CRT-dependent factors should be  
477 involved. In a similar manner, we observed that CypB silencing prevented the increase in Slug  
478 levels after Ionomycin treatment. Ionomycin is a Ca<sup>2+</sup> ionophore, while thapsigargin irreversible  
479 inhibits the SERCA pump, abrogating the reuptake of cytosolic calcium into the ER, and thus  
480 causing depletion of Ca<sup>2+</sup> within the ER. Since both thapsigargin-induced SERCA inhibition and  
481 CypB silencing had the same effects on Slug expression, and it has been described that CRT  
482 regulates SERCA activity (66), we hypothesize that the lack of Slug expression on CypB-  
483 silenced cells could result from impaired CRT modulation of SERCA activity. In addition, it has  
484 been described that CypB overexpression protects against thapsigargin-induced cell death,  
485 attenuating calcium release from the ER (67). Taken together, our results indicate that CypB  
486 regulation of Slug could be related to the indirect action of CypB on ER calcium stores through  
487 interaction with the major calcium binding chaperone CRT.

488 In conclusion, we uncovered new roles for CypA and CypB in modulating proximal  
489 tubular cell phenotype in differentiation and EMT processes, most likely through regulation of  
490 the expression of the transcriptional repressors Slug and Snail. Our results also reconsider the  
491 functional relevance between both repressors, placing Slug as a key regulator of EMT in the  
492 fibrotic kidney. As modulators of EMT, targeting CypA or CypB could have a great impact not  
493 only on the overall outcome of kidney fibrosis but also in other processes where cell-cell  
494 contacts are critical, such as in cancer. Moreover, we also propose a crucial role of CypB in  
495 regulating the inflammatory response that precedes kidney fibrosis, establishing CypB as an  
496 important link between inflammation and fibrogenesis. Finally, development of drugs specifically  
497 targeting CypB could have a therapeutic benefit to reduce TGF $\beta$  effects and ameliorate kidney  
498 fibrosis.



499 **Methods**

500

501 **Unilateral ureteral obstruction (UO) procedure**

502 Unilateral ureteral obstruction was performed as previously described (68). Briefly, mice  
503 were anesthetized by intraperitoneal injection of pentobarbital (50 mg/kg). Through a 2 cm  
504 midline abdominal incision, the left kidney was exposed by retraction of the intestines using a  
505 self-retaining microdissection retractor and the left ureter was carefully dissected from  
506 surrounding tissue. The ureter was then doubly ligated at the midpoint between the kidney and  
507 the bladder using sterile 6-0 silk suture. The surgical incision was then closed and the mouse  
508 was allowed to recover from anesthesia; postoperative analgesia (buprenorphine, 0.1 mg/kg,  
509 SQ) was administered. Sham-operated control mice underwent a similar surgical procedure  
510 without ligation of the ureter.

511

512 **RNA extraction and RT-PCR**

513 Total RNA was isolated using TRIzol® Reagent (#15596-026, Ambion, Life Technologies)  
514 according to manufacturer's instructions. Reverse transcription was performed from 2 µg of total  
515 RNA with kit High-Capacity RNA-to-cDNA™ Kit (Applied Biosystems, #4387406). Quantitative  
516 RT-PCR was carried out on an ABI PRISM 7900 Sequence Detection System (Applied  
517 Biosystems) using pre-designed FAM-labeled TaqMan probes (Applied Biosystems). All probes  
518 used in this work are listed in Supplemental Material. Analysis of relative gene expression data  
519 was performed using the  $2^{-\Delta\Delta Ct}$  method after normalizing to TBP.

520

521 **Cell culture**

522 Human kidney proximal tubule cells (HK-2), which retain morphologic and functional  
523 attributes of normal adult human proximal tubular epithelium (69), were cultured in medium A  
524 (DMEM:Ham's F12 (1:1, v/v), 20 mM HEPES, 2mM L-glutamine, 12.5 mM D-glucose, 60 nM  
525 sodium selenite, 5 µg/ml transferrin, 50 nM dexamethasone, 100 U/ml penicillin and 100 µg/ml



526 streptomycin) supplemented with 2% fetal bovine serum (FBS), 5 µg/ml insulin, 10 ng/ml  
527 epidermal growth factor (EGF) and 1 nM triiodothyronine, at 37 °C in a 95:5 air:CO<sub>2</sub> water-  
528 saturated atmosphere. For all experiments, cells were seeded at 0.1×10<sup>6</sup> cells/ml. For TGFβ  
529 treatments, cells were starved in medium A supplemented with only 0.1% FBS and without  
530 insulin, EGF or triiodothyronine (starvation medium). After 16 hours starvation, medium was  
531 removed and cells were treated for the indicated times with fresh starvation medium containing  
532 1.5 ng/ml TGFβ (#100-B-001, R&D Systems). When indicated, cells were treated with the  
533 indicated doses of human TGFβ (#100-B-001, R&D Systems, Minneapolis, MN, USA), MG-132  
534 (#BML-PI102, Enzo Life Sciences, Farmingdale, NY, USA), Cyclosporine-A (#239835,  
535 Calbiochem, San Diego, CA, USA), Brefeldin-A (#B6542, Sigma-Aldrich, St. Louis, MO, USA),  
536 human CypB (#NBC1-18424, Novus Biologicals, Littleton, CO, USA), Ionomycin (#I0634,  
537 Sigma-Aldrich) Thapsigargin (#586005, Calbiochem).

538

### 539 **Gene silencing**

540 CypA, CypB and CD147 silencing was performed as described in (58). For CypA and  
541 CypB silencing, shRNA-containing lentiviral particles were generated by co-transfecting  
542 HEK293T cells with second generation vectors including the transfer vector pAPM, carrying the  
543 shRNA and puromycin resistance, the HIV-1 packaging plasmid psPAX2, and a VSVg  
544 expression plasmid (pMD2.G) (complete information about these vectors is available at (70)).  
545 For CD147 silencing, a MISSION® TRC shRNA transfer vector (TRCN000006732) was  
546 cotransfected with the third generation vectors VSVG, RTR2 and PKGPIR, which provide the  
547 envelope, packaging and reverse-expressing proteins, respectively. Viral supernatants were  
548 then harvested, supplemented and added to HK-2 cells in the presence of polybrene  
549 (Hexadimethrin bromide, Sigma-Aldrich). shRNA sequences were indicated in supplemental  
550 material.

551

### 552 **Co-Immunoprecipitation**

553 For coimmunoprecipitation (CoIP) assays, cells were lysed in CoIP buffer (50 mM Tris-  
554 HCl pH 7.5, 150 mM NaCl, 2 mM EDTA, 10 % glycerol and 1 % Triton) containing protease and  
555 phosphatase inhibitors, and 750 µg of cell extracts were incubated with 40 µl of anti-HA Affinity  
556 Matrix (clone 3F10, #11815016001, Roche, Mannheim, Germany) overnight at 4 °C on a rotary  
557 mixer. Beads were then washed 5x with CoIP buffer, and proteins bound to the beads were  
558 eluted by incubating the beads with 80 µl of 1 µg/µl HA peptide (#11666975001, Roche) for 1  
559 hour at 37 °C.

560

### 561 **Western blot**

562 Cells were lysed with RIPA buffer supplemented with protease inhibitor cocktail (Sigma-  
563 Aldrich) and the protein content of cellular extracts was quantified by the BCA assay (Thermo  
564 Scientific). Equal amounts of whole cell extract protein were run on SDS PAGE gels and  
565 transferred onto PVDF membranes. Membranes were then blocked 1 hour at RT and incubated  
566 overnight at 4 °C with the corresponding antibodies (a complete list of all antibodies used in this  
567 work is shown in Supplemental Material). Finally, membranes were developed with the  
568 enhanced chemiluminescence method (Millipore) and exposed on hyperfilm. For western blots  
569 of extracellular cyclophilins, extracellular media were collected and centrifuged 5 minutes at  
570 1500g. Thereafter, 200 µl of each supernatant was mixed with 50 µl of 5x sample buffer, and 50  
571 µl of the resulting mix loaded on the western blot.

572

### 573 **Enzymatic activity assays**

574 For determination of alkaline phosphatase (AP), dipeptidyl peptidase-4 (DPP4) and γ-  
575 glutamyltransferase (GGT-2) activities, HK-2 cells were grown for 2, 5, and 10 days, and whole  
576 cell extracts were prepared with mannitol buffer (50mM D-mannitol, 2mM Tris and 0.1% Triton  
577 X-100) supplemented with protease inhibitor cocktail. AP and DPP4 activities were analyzed as  
578 described in (71). For AP activity assay, 50µg of protein in a final volume of 50µl of mannitol  
579 buffer were incubated with 200 µl of p-nitrophenyl phosphate Liquid Substrate System (#N7653,

580 Sigma-Aldrich) for 15 min at 37 °C and the absorbance was then measured at 405nm. For  
581 DPP4 activity assay, 50µg of protein in 90µl of mannitol buffer were mixed with 10 µl of 1.4M  
582 glycine-NaOH pH 8.7 and incubated with 100µl of 1.5mM glycy-L-proline-p-nitroanilide for 30  
583 min at 37 °C. Reaction was stopped by adding trichloroacetic acid. Samples were centrifuged  
584 and 50 µl of supernatant were mixed with 50µl of cold 0.2% sodium nitrite and incubated for 10  
585 min at 4 °C. The mixture was then incubated with 50µl of 0.5% ammonium sulfamate for 2 min,  
586 at the end of which 100µl of 0.05% n-(1-naphthyl)- ethanediamine were added to the mix, which  
587 was further incubated in the dark at 37 °C for additional 30min. Absorbance was then read at  
588 548nm. Finally, GGT activity was analyzed using a Roche/Hitachi Cobas C system. 50 µg of  
589 protein in 100 µl of mannitol buffer were incubated with L- γ-glutamyl-3-carboxy-4-nitranilide as  
590 γ-glutamyl donor in the presence of glycy-L-glycine and the rate of formation of 5-amino-2-  
591 nitrobenzoate was measured spectrophotometrically at 405 nm. All these experiments were  
592 performed at least three independent times in triplicate.

593

#### 594 **Vectors and Site-directed mutagenesis**

595 For shRNA rescue experiments, wild-type hCypA and wild-type hCypB were cloned into  
596 pDONR vectors (pDONR™221, #12536-017, Invitrogen) using the Gateway cloning system  
597 (Invitrogen). The QuickChange site-directed mutagenesis kit (Agilent Technologies) was then  
598 used to introduce the following silent mutations (c.[151C>A; 153G>A; 156G>T; 159C>T;  
599 162T>C; 165T>C]) in the shRNA targeting sequence of hCypB (see Figure 2A). Since shRNA  
600 against hCypA was directed to the 3' UTR no further modifications were required. The shRNA-  
601 rescuing vectors were additionally used to introduce mutations altering PPIase activity of CypA  
602 (c.161\_162delinsGC; p.Arg55Ala) and CypB (c.259\_260delinsGC; p.Arg62Ala). To generate the  
603 ER location mutant of hCypB (c.4\_75del; p.2\_25del), restriction sites were introduced at both  
604 sides of the fragment to be deleted. Once all the mutations were performed, all inserts were  
605 subcloned to the final destination vector (pLenti CMV Hygro DEST 117-1, Addgene), containing  
606 hygromycin resistance, by Gateway recombination. All primers used were generated with the  
607 QuikChange Primer Design (Agilent Technologies) tool. Sequences of all constructs were  
608 confirmed by DNA sequencing.

609

610 **ICC**

611 HK-2 cells were seeded on microscope cover glasses (Marlenfeld GmbH & Co.KG) for  
612 5 days, and, when indicated, starved overnight and treated with 1.5 ng/ml TGF $\beta$  for 24 h. Slides  
613 were then washed twice in PBS and fixed in 4% paraformaldehyde for 1 h. Aldehyde groups  
614 were then blocked with 50 mM NH<sub>4</sub>Cl for 30 min and cells were permeabilized with 0.1% triton  
615 X-100 for 10 min. Prior to addition of primary antibodies, unspecific binding sites were blocked  
616 with 5% BSA in PBS for 30 min. Slides were then incubated overnight at 4 °C with a 1:100  
617 dilution of primary antibodies and subsequently labeled with secondary fluorescent antibodies  
618 (1:200 dilution; see Supplemental Material for references) and Hoechst 33342 (H1399,  
619 Invitrogen) for nuclear staining 1 hour at room temperature. Fluorescence labeling was  
620 visualized in a confocal spectral FV 1000 Olympus microscope.

621

622 **Cell Proliferation**

623 Cell proliferation was measured using carboxyfluorescein diacetate succinimidyl ester  
624 (CFSE) staining. Cells were trypsinized, washed with PBS, and incubated with CFSE  
625 (Invitrogen) at 2.5  $\mu$ M final concentration for 10 min at 37 °C in the dark in a cell culture  
626 incubator. An aliquot of cells was left unlabeled to set background fluorescence. CFSE was then  
627 quenched by washing cells twice with complete medium, and a portion of cells was taken to  
628 measure fluorescence at the beginning of the experiment. The rest of labeled cells were plated  
629 on six-well plates and incubated at 37°C in 5% CO<sub>2</sub> for 5 days. Flow cytometric analysis was  
630 performed on a FACScalibur (Becton Dickinson) flow cytometer and analyzed with Cell Quest  
631 software (Becton Dickenson). Cell proliferation was expressed as the ratio FInd/MFI, where MFI  
632 was the median fluorescence intensity of all viable cells at collection and Find the peak  
633 fluorescence intensity of the viable non-divided cells.

634

635 **TEER and Dextran permeability**

636 For Transepithelial electrical resistance (TEER) and Fluorescein isothiocyanate–dextran  
637 (FITC–Dextran) permeability experiments cells were seeded on 24-well transwell plates with 0.4  
638  $\mu\text{m}$  pore polyester membrane inserts (HTS transwell-24 PET; #CLS3379-2EA, Sigma-Aldrich  
639 Saint Louis, Missouri, USA) and measurements were performed 5 days after seeding the cells.  
640 TEER was measured using an epithelial voltmeter (Millicell-ERS, Millipore, Billerica, MA, USA)  
641 with STX100C electrode (for 24 well format) (World Precision Instruments, Sarasota, FL, USA)  
642 according to manufacturer's instructions. For permeability assay, 40 kDa FITC–Dextran (Sigma-  
643 Aldrich) in a final concentration of 100  $\mu\text{g}/\text{ml}$  was added to the apical compartment of the cells.  
644 180 minutes after adding FITC–Dextran, 200  $\mu\text{l}$  samples were collected from the basolateral  
645 compartment and absorbance was measured at 485nm of excitation and 528 nm of emission  
646 with a microplate reader (Spectramax Gemini, Molecular Devices, Sunnyvale, CA, USA).  
647 Experiments were performed in triplicate with 8 independent samples per group.

648

#### 649 **NF $\kappa$ B activity**

650 To determine NF $\kappa$ B activity,  $3 \times 10^4$  HK-2 cells were seeded on each well of a 24-well  
651 plate and incubated for 24 h. Cells were then cotransfected with 500 ng/well of a DNA mix  
652 containing reporter plasmid NF $\kappa$ B (Firefly luciferase gene with NF $\kappa$ B promoter) and reporter  
653 plasmid RLTK (Renilla luciferase gene with thymidine kinase promoter) in a 5:1 ratio, plus either  
654 negative control plasmid (pCMV-HA) or positive control plasmid (p65 subunit of NF $\kappa$ B).  
655 Transfection was performed using Lipofectamine 3000 transfection kit (#L3000-001; Thermo  
656 Fisher Scientific, Waltham, MA USA) according to the manufacturer's instructions. Cells were  
657 lysed and luciferase assay was performed using a Dual-Luciferase® Reporter Assay System  
658 (#E1910, Promega, Fitchburg, WI, USA). Transfection efficiency was normalized by the value of  
659 cotransfected Renilla luciferase.

660

#### 661 **Cell Adhesion assay**

662 A cell adhesion assay was performed and modified as described previously (72). HK-2  
663 cells were treated or not with 1,5 ng/ml TGF $\beta$  for 48 h. Control and TGF $\beta$ -treated HK-2 cells

664 were then trypsinized and washed twice with culture medium to eliminate trypsin. Subsequently,  
665 cells were counted and  $2 \times 10^4$  cells/well were seeded onto two duplicated 96-well plates. Cells  
666 were then allowed to adhere at 37 °C for 30 minutes. After the incubation period, unattached  
667 cells from one of the plates were removed by washing twice with PBS. The amount of the  
668 remaining attached cells (from the washed plate) and the total of cells (from the unwashed  
669 plate) was determined using the XTT assay. For each treatment condition, results were  
670 expressed as the ratio of XTT values from washed and unwashed plate.

671

## 672 **Statistics**

673 Results were expressed as the mean  $\pm$  standard error of the mean (SEM). Experiments  
674 performed in mice were analyzed by two-way analysis of variance (ANOVA) followed by Tukey  
675 multiple comparison test. For the remaining experiments, Student's t-test was used for statistical  
676 analysis. A P value of less than 0.05 was considered to indicate statistically-significant  
677 differences. Statistical analyses were made with commercially available software (GraphPad  
678 Prism, version 6.00 for Windows, GraphPad Software, La Jolla California USA).

679

## 680 **Study approval**

681 Animal studies were conducted as approved by the Institutional Animal Care and Use  
682 Committee of Mayo Clinic and in accordance with National Institutes of Health guidelines.

683 **Author Contributions**

684 ES and AM conceived and designed the research studies. ES, MD, AR, AC, KA, MS  
685 and JG conducted the experiments. RB provided the CypB KO mice. ES, AM, RB and DB  
686 analyzed the data. ES, AM, DB, KA and RB draft the manuscript. All authors read and approved  
687 the final manuscript.

688

689 **Acknowledgements**

690 Eduard Sarró and Mónica Durán were supported by the generous contribution of Asdent  
691 Patients Association. This work was supported in part by grants from Ministerio de Ciencia e  
692 Innovación (SAF2011-2950 and SAF2014-59945-R to A. Meseguer), the Fundación Senefro  
693 (SEN to A. Meseguer), Instituto de Salud CarlosIII (PIE13/00027), and Red de Investigación  
694 Renal REDinREN (12/0021/0013). Karl A. Nath is supported by NIH DK 47060. Meseguer's  
695 research group holds the Quality Mention from the Generalitat de Catalunya (2014 SGR). We  
696 want to thank Dr. Santiago Lamas and Dr. José Miguel López-Novoa for critical reading of this  
697 manuscript.

698

699 **Conflict of Interests**

700 The authors declare that they have no conflict of interest

701 **References**

- 702 1. Declèves AE, Sharma K. Novel targets of antifibrotic and anti-inflammatory  
703 treatment in CKD [Internet]. *Nat. Rev. Nephrol.* 2014;10(5):257–267.
- 704 2. Lovisa S et al. Epithelial to Mesenchymal Transition induces cell cycle arrest and  
705 parenchymal damage in renal fibrosis. *Nat. Med.* 2016;21(9):998–1009.
- 706 3. Grgic I et al. Targeted proximal tubule injury triggers interstitial fibrosis and  
707 glomerulosclerosis [Internet]. *Kidney Int.* 2012;82(2):172–183.
- 708 4. Meng X, Nikolic-Paterson DJ, Lan HY. TGF- $\beta$ : the master regulator of fibrosis  
709 [Internet]. *Nat. Rev. Nephrol.* 2016;12(6):325–338.
- 710 5. Bonventre J V., Zuk A. Ischemic acute renal failure: An inflammatory disease? In:  
711 *Kidney International.* 2004:
- 712 6. Torres IB, Moreso F, Sarró E, Meseguer A, Serón D. The Interplay between  
713 Inflammation and Fibrosis in Kidney Transplantation 2014;2014.
- 714 7. Iwano M et al. Evidence that fibroblasts derive from epithelium during tissue fibrosis.  
715 *J. Clin. Invest.* 2002;110(3):341–350.
- 716 8. Peinado H, Olmeda D, Cano A. Snail, ZEB and bHLH factors in tumour progression:  
717 An alliance against the epithelial phenotype?. *Nat. Rev. Cancer* 2007;7(6):415–428.
- 718 9. Bolos V et al. The transcription factor Slug represses E-cadherin expression and  
719 induces epithelial to mesenchymal transitions: a comparison with Snail and E47  
720 repressors [Internet]. *J. Cell Sci.* 2016;129(6):1283–1283.
- 721 10. Boutet A, Esteban MA, Maxwell PH, Nieto MA. Reactivation of Snail genes in  
722 renal fibrosis and carcinomas: A process of reversed embryogenesis?. *Cell Cycle*  
723 2007;6(6):638–642.
- 724 11. Grande MT et al. Snail1-induced partial epithelial-to-mesenchymal transition drives  
725 renal fibrosis in mice and can be targeted to reverse established disease. *Nat. Med.*  
726 2015;21(9):989–997.
- 727 12. Bennett WM, Demattos A, Meyer MM, Andoh T, Barry JM. Chronic cyclosporine  
728 nephropathy: The Achilles' heel of immunosuppressive therapy. *Kidney Int.*  
729 1996;50(4):1089–1100.
- 730 13. Slattery C, Campbell E, McMorrow T, Ryan MP. Cyclosporine A-induced renal  
731 fibrosis: a role for epithelial-mesenchymal transition. [Internet]. *Am. J. Pathol.*  
732 2005;167(2):395–407.
- 733 14. González-Guerrero C et al. TLR4-mediated inflammation is a key pathogenic event  
734 leading to kidney damage and fibrosis in cyclosporine nephrotoxicity. *Arch. Toxicol.*  
735 2017;91(4):1925–1939.
- 736 15. Handschumacher RE, Harding MW, Rice J, Drugge RJ, Speicher DW. Cyclophilin:



- 737 a specific cytosolic binding protein for cyclosporin A. [Internet]. *Science*  
738 1984;226(4674):544–7.
- 739 16. Göthel SF, Marahiel MA. Peptidyl-prolyl cis-trans isomerases, a superfamily of  
740 ubiquitous folding catalysts. *Cell. Mol. Life Sci.* 1999;55(3):423–436.
- 741 17. Wang P, Heitman J. The cyclophilins. [Internet]. *Genome Biol.* 2005;6(7):226.
- 742 18. Bernasconi R et al. Cyclosporine A-Sensitive, Cyclophilin B-Dependent  
743 endoplasmic reticulum-associated degradation. *PLoS One* 2010;5(9):1–7.
- 744 19. Price ER et al. Cyclophilin B trafficking through the secretory pathway is altered by  
745 binding of cyclosporin A.. *Proc. Natl. Acad. Sci. U. S. A.* 1994;91(9):3931–3935.
- 746 20. Tegeder I et al. Elevated serum cyclophilin levels in patients with severe sepsis  
747 [Internet]. *J Clin Immunol* 1997;17(5):380–386.
- 748 21. Billich A, Winkler G, Aschauer H, Rot A, Peichl P. Presence of cyclophilin A in  
749 synovial fluids of patients with rheumatoid arthritis [Internet]. *J Exp Med*  
750 1997;185(5):975–980.
- 751 22. De Ceuninck F, Allain F, Caliez A, Spik G, Vanhoutte PM. High binding capacity  
752 of cyclophilin B to chondrocyte heparan sulfate proteoglycans and its release from the  
753 cell surface by matrix metalloproteinases: Possible role as a proinflammatory mediator  
754 in arthritis. *Arthritis Rheum.* 2003;48(8):2197–2206.
- 755 23. Xu Q, Leiva MC, Fischkoff SA, Handschumacher RE, Lyttle CR. Leukocyte  
756 chemotactic activity of cyclophilin. *J. Biol. Chem.* 1992;267(17):11968–11971.
- 757 24. Allain F et al. Interaction with glycosaminoglycans is required for cyclophilin B to  
758 trigger integrin-mediated adhesion of peripheral blood T lymphocytes to extracellular  
759 matrix [Internet]. *Proc. Natl. Acad. Sci.* 2002;99(5):2714–2719.
- 760 25. Yurchenko V, Constant S, Bukrinsky M. Dealing with the family: CD147  
761 interactions with cyclophilins. *Immunology* 2006;117(3):301–309.
- 762 26. Cebrián C et al. Kidney Androgen-regulated Protein Interacts with Cyclophilin B  
763 and Reduces Cyclosporine A-mediated Toxicity in Proximal Tubule Cells. *J. Biol.*  
764 *Chem.* 2001;276(31):29410–29419.
- 765 27. Tornavaca O et al. KAP degradation by calpain is associated with CK2  
766 phosphorylation and provides a novel mechanism for cyclosporine A-induced proximal  
767 tubule injury. [Internet]. *PLoS One* 2011;6(9):e25746.
- 768 28. Suñé G et al. Cyclophilin B interacts with sodium-potassium ATPase and is required  
769 for pump activity in proximal tubule cells of the kidney. *PLoS One* 2010;5(11).  
770 doi:10.1371/journal.pone.0013930
- 771 29. Liu WF, Nelson CM, Pirone DM, Chen CS. E-cadherin engagement stimulates  
772 proliferation via Rac1. *J. Cell Biol.* 2006;173(3):431–441.

- 773 30. Panchapakesan U. DPP4 Inhibition in Human Kidney Proximal Tubular Cells -  
774 Renoprotection in Diabetic Nephropathy? [Internet]. *J. Diabetes Metab.* 2013;S9:1–8.
- 775 31. Min HS et al. Dipeptidyl peptidase IV inhibitor protects against renal interstitial  
776 fibrosis in a mouse model of ureteral obstruction [Internet]. *Lab. Investig.*  
777 2014;94(6):598–607.
- 778 32. Lamouille S, Xu J, Derynck R. Molecular mechanisms of epithelial-mesenchymal  
779 transition.. *Natl. Rev. Mol. Cell Biol.* 2014;15(3):178–196.
- 780 33. Yan X, Liu Z, Chen Y. Regulation of TGF-beta signaling by Smad7.. *Acta Biochim.*  
781 *Biophys. Sin. (Shanghai).* 2009;41(4):263–272.
- 782 34. Meng X, Nikolic-Paterson DJ, Lan HY. Inflammatory processes in renal fibrosis.  
783 [Internet]. *Nat. Rev. Nephrol.* 2014;10(9):493–503.
- 784 35. Torres IB, Moreso F, Sarró E, Meseguer A, Serón D. The interplay between  
785 inflammation and fibrosis in kidney transplantation. *Biomed Res. Int.* 2014;2014.  
786 doi:10.1155/2014/750602
- 787 36. Wu Y et al. Stabilization of snail by NF-kappaB is required for inflammation-  
788 induced cell migration and invasion. [Internet]. *Cancer Cell* 2009;15(5):416–28.
- 789 37. Bukrinsky MI. Cyclophilins: Unexpected messengers in intercellular  
790 communications. *Trends Immunol.* 2002;23(7):323–325.
- 791 38. Yurchenko V et al. CD147 is a signaling receptor for cyclophilin B.. *Biochem.*  
792 *Biophys. Res. Commun.* 2001;288(4):786–788.
- 793 39. Kozlov G et al. Structural basis of cyclophilin B binding by the calnexin/calreticulin  
794 P-domain. *J. Biol. Chem.* 2010;285(46):35551–35557.
- 795 40. Hayashida Y et al. Calreticulin represses E-cadherin gene expression in Madin-  
796 Darby canine kidney cells via slug. *J. Biol. Chem.* 2006;281(43):32469–32484.
- 797 41. Wu Y et al. Calreticulin regulates TGF- $\beta$ 1-induced epithelial mesenchymal  
798 transition through modulating Smad signaling and calcium signaling [Internet]. *Int. J.*  
799 *Biochem. Cell Biol.* 2017;90:103–113.
- 800 42. Prakoura N, Politis PK, Ihara Y, Michalak M, Charonis AS. Epithelial calreticulin  
801 up-regulation promotes profibrotic responses and tubulointerstitial fibrosis development  
802 [Internet]. *Am. J. Pathol.* 2013;183(5):1474–1487.
- 803 43. Huang S, Susztak K. Epithelial Plasticity versus EMT in Kidney Fibrosis. *Trends*  
804 *Mol. Med.* 2016;22(1):4–6.
- 805 44. Trivedi DK, Yadav S, Vaid N, Tuteja N. Genome wide analysis of Cyclophilin gene  
806 family from rice and Arabidopsis and its comparison with yeast. *Plant Signal. Behav.*  
807 2012;7(12):1653–1666.
- 808 45. Bukrinsky M. Extracellular cyclophilins in health and disease [Internet]. *Biochim.*

- 809 *Biophys. Acta - Gen. Subj.* 2015;1850(10):2087–2095.
- 810 46. Fang F, Flegler AJ, Du P, Lin S, Clevenger C V. Expression of cyclophilin B is  
811 associated with malignant progression and regulation of genes implicated in the  
812 pathogenesis of breast cancer. [Internet]. *Am. J. Pathol.* 2009;174(1):297–308.
- 813 47. Kim Y et al. Role of cyclophilin B in tumorigenesis and cisplatin resistance in  
814 hepatocellular carcinoma in humans. *Hepatology* 2011;54(5):1661–1678.
- 815 48. Li T et al. Gastric cancer cell proliferation and survival is enabled by a cyclophilin  
816 B/STAT3/MIR-520d-5p signaling feedback loop. *Cancer Res.* 2017;77(5):1227–1241.
- 817 49. Choi JW, Schroeder MA, Sarkaria JN, Bram RJ. Cyclophilin B supports MYC and  
818 mutant p53-dependent survival of glioblastoma multiforme cells. *Cancer Res.*  
819 2014;74(2):484–496.
- 820 50. Pallet N et al. Cyclosporine-induced endoplasmic reticulum stress triggers tubular  
821 phenotypic changes and death.. *Am. J. Transplant* 2008;8(11):2283–2296.
- 822 51. Villarejo A, Cortés-Cabrera Á, Molina-Ortíz P, Portillo F, Cano A. Differential role  
823 of snail1 and snail2 zinc fingers in E-cadherin repression and epithelial to mesenchymal  
824 transition. *J. Biol. Chem.* 2014;289(2):930–941.
- 825 52. Chung ACK et al. Smad7 suppresses renal fibrosis via altering expression of TGF-  
826  $\beta$ /Smad3-regulated microRNAs [Internet]. *Mol. Ther.* 2013;21(2):388–398.
- 827 53. Yan X, Chen YG. Smad7: not only a regulator, but also a cross-talk mediator of  
828 TGF-beta signalling [Internet]. *Biochem. J.* 2011;434(1):1–10.
- 829 54. Peng H et al. Secreted cyclophilin A, a peptidylprolyl cis-trans isomerase, mediates  
830 matrix assembly of Hensin, a protein implicated in epithelial differentiation. *J. Biol.*  
831 *Chem.* 2009;284(10):6465–6475.
- 832 55. Mittal N, Voldman J. Nonmitogenic survival-enhancing autocrine factors including  
833 cyclophilin A contribute to density-dependent mouse embryonic stem cell growth. *Stem*  
834 *Cell Res.* 2011;6(2):168–176.
- 835 56. Iordanskaia T et al. Targeting extracellular cyclophilins ameliorates disease  
836 progression in experimental biliary atresia. [Internet]. *Mol. Med.* 2015;21(1):657 – 664.
- 837 57. Bram RJ, Crabtree GR. Calcium signalling in T cells stimulated by a cyclophilin B-  
838 binding protein [Internet]. *Nature* 1994;371(6495):355–358.
- 839 58. Suñé G et al. Cyclophilin B interacts with sodium-potassium ATPase and is required  
840 for pump activity in proximal tubule cells of the kidney [Internet]. *PLoS One*  
841 2010;5(11):e13930.
- 842 59. Stumpf T et al. The human TRPV6 channel protein is associated with cyclophilin B  
843 in human placenta. *J. Biol. Chem.* 2008;283(26):18086–18098.
- 844 60. Meunier L, Usherwood Y-K, Chung KT, Hendershot LM. A Subset of Chaperones

- 845 and Folding Enzymes Form Multiprotein Complexes in Endoplasmic Reticulum to Bind  
846 Nascent Proteins. *Mol. Biol. Cell* 2002;13(December):4456–4469.
- 847 61. Jansen G et al. An Interaction Map of Endoplasmic Reticulum Chaperones and  
848 Foldases [Internet]. *Mol. Cell. Proteomics* 2012;11(9):710–723.
- 849 62. Karimzadeh F, Opas M. Calreticulin Is Required for TGF- $\beta$ -Induced Epithelial-to-  
850 Mesenchymal Transition during Cardiogenesis in Mouse Embryonic Stem Cells  
851 [Internet]. *Stem Cell Reports* 2017;8(5):1299–1311.
- 852 63. Zimmerman KA, Graham L V., Pallero MA, Murphy-Ullrich JE. Calreticulin  
853 regulates transforming growth factor- $\beta$ -stimulated extracellular matrix production. *J.*  
854 *Biol. Chem.* 2013;288(20):14584–14598.
- 855 64. Owusu BY, Zimmerman KA, Murphy-ullrich JE. The role of the endoplasmic  
856 reticulum protein calreticulin in mediating TGF-  $\beta$  -stimulated extracellular matrix  
857 production in fibrotic disease. *J. Cell Commun. Signal.* [published online ahead of print:  
858 2017]; doi:10.1007/s12079-017-0426-2
- 859 65. Kozlov G et al. Structural basis of cyclophilin B binding by the calnexin/calreticulin  
860 P-domain. *J. Biol. Chem.* 2010;285(46):35551–35557.
- 861 66. Michalak M, Parker JMR, Opas M. Ca<sup>2+</sup> signaling and calcium binding chaperones  
862 of the endoplasmic reticulum. *Cell Calcium* 2002;32(5-6):269–278.
- 863 67. Kim J et al. Overexpressed cyclophilin B suppresses apoptosis associated with ROS  
864 and Ca<sup>2+</sup> homeostasis after ER stress. [Internet]. *J. Cell Sci.* 2008;121(Pt 21):3636–48.
- 865 68. Kie J-H, Kapturczak MH, Traylor A, Agarwal A, Hill-Kapturczak N. Heme  
866 oxygenase-1 deficiency promotes epithelial-mesenchymal transition and renal fibrosis..  
867 *J. Am. Soc. Nephrol.* 2008;19(9):1681–1691.
- 868 69. Ryan MJ et al. HK-2: An immortalized proximal tubule epithelial cell line from  
869 normal adult human kidney [Internet]. *Kidney Int.* 1994;45(1):48–57.
- 870 70. Pertel T et al. TRIM5 is an innate immune sensor for the retrovirus capsid lattice  
871 [Internet]. *Nature* 2011;472(7343):361–365.
- 872 71. Mazzolini R et al. Brush border Myosin Ia has tumor suppressor activity in the  
873 intestine. *Proc. Natl. Acad. Sci.* 2012;109:1530–1535.
- 874 72. Lamouille S, Derynck R. Cell size and invasion in TGF- $\beta$ -induced epithelial to  
875 mesenchymal transition is regulated by activation of the mTOR pathway. *J. Cell Biol.*  
876 2007;178(3):437–451.
- 877

878 **FIGURE LEGENDS**

879

880 **Figure 1. CypB and CypA silencing differentially affects epithelial phenotype of cultured**

881 **PTC.** To investigate the potential involvement of cyclophilins in the regulation of the epithelial  
882 phenotype, CypA and CypB were silenced in the proximal tubular epithelial cell line HK-2. (A)  
883 Western Blot showing the decrease in CypA and CypB expression in HK-2 cells stably  
884 transfected with shRNA-expressing lentiviral vectors against CypA or CypB, respectively. (B)  
885 The expression levels of the epithelial markers E-cadherin, ZO-1, occludin and keratin in HK-2  
886 wild-type cells after 2, 5 and 10 days of culture were analyzed by western blot. The expression  
887 levels of the above epithelial markers in CypA and CypB-silenced cells after 5 days of culture  
888 were determined by immunoblotting (C) and real time quantitative PCR (qPCR) (D). (E)  
889 Immunofluorescence staining of E-cadherin (green) in CypA and CypB-silenced cells cultured  
890 for 5 days, showing membrane location of E-cadherin in CypB-silenced cells. Calnexin (red)  
891 was used to stain endoplasmic reticulum. (F) Cell proliferation in control and CypA and CypB-  
892 silenced cells was measured by means of carboxyfluorescein succinimidyl ester (CFSE)  
893 labeling followed by flow cytometry analysis as indicated in Methods. Values indicate the ratio  
894  $F_{Ind}/MFI$ , where MFI was the median fluorescence intensity of all viable cells at collection and  
895  $F_{Ind}$  the peak fluorescence intensity of the viable non-divided cells. To assess monolayer  
896 integrity after CypA and CypB-silencing, transepithelial electric resistance (TEER) (G) and FITC-  
897 labeled Dextran permeability (H) were measured in cyclophilin-silenced HK-2 cells cultured for 5  
898 days. Enzymatic activities of alkaline phosphatase (AP) (I), dipeptidyl peptidase-IV (DPP-IV) (J)  
899 and gamma-glutamyltransferase (GGT) (K) in CypA and CypB-silenced cells after 2, 5 and 10  
900 days of culture. (L) The expression levels of the transcriptional repressors Snail, Slug, Twist1  
901 and Zeb1 were analyzed by real time quantitative PCR (qPCR). Finally, levels of Slug and Snail  
902 in HK-2 wild-type cells after 2, 5 and 10 days of culture (M) or in CypA and CypB-silenced cells  
903 at 5 days of culture (N) were analyzed by Western Blot. Student's t-test was used to compare  
904 shCon vs shCypA or shCon vs shCypB for each culture time point. \*  $P < 0.05$ .

905

906 **Figure 2. Cyclophilin A and B exert divergent effects on TGF $\beta$  action on epithelial cells.**

907 (A) HK-2 wt cells were treated with 1,5 ng/ml TGF $\beta$  for the indicated times and the expression

908 levels of E-cadherin, occludin, fibronectin, actin, CypA and CypB were analyzed by western  
909 blot. (B) CypA- and CypB-silenced HK-2 cells were treated with 1,5 ng/ml TGF $\beta$  for 24 h and the  
910 expression levels of E-cadherin, occludin, fibronectin, actin, CypA and CypB were analyzed by  
911 western blot. (C) CypA- and CypB-silenced HK-2 cells were treated with 1,5 ng/ml TGF $\beta$  for 24  
912 h and cells were then visualized under a light microscope. (D) CypA- and CypB-silenced HK-2  
913 cells were treated with 1,5 ng/ml TGF $\beta$  for 48 h, trypsinized and seeded again. Cell were  
914 allowed to adhere for 30 minutes, after which unattached cells were removed and the amount of  
915 the remaining attached cells measured as indicated in methods. (E) HK-2 wt cells were treated  
916 with 1,5 ng/ml TGF $\beta$  for the indicated times and the expression levels of Slug and Snail and the  
917 phosphorylation status and expression levels of Smad3 and smad2 were analyzed by western  
918 blot. (F) Control, CypA and CypB-silenced HK-2 cells were treated with 1,5 ng/ml TGF $\beta$  for 3h  
919 or 24 h and the expression levels of slug and snail, and the phosphorylation status and  
920 expression levels of Smad3, smad2 and smad4 were analyzed by western blot. Panels on the  
921 right show the Slug/actin and Snail/actin ratios, referred to control shRNA-treated cells exposed  
922 to TGF $\beta$ , and the mRNA levels of Slug and Snail analyzed by qPCR. (G) CypA and CypB-  
923 silenced HK-2 cells were treated with 1,5 ng/ml TGF $\beta$  for 24 h, with the proteasome inhibitor  
924 MG132 (5  $\mu$ M) added to cells for the lasts 16 h of TGF $\beta$  treatment. Slug levels were analyzed  
925 by Western blot. (H) Nuclear translocation of Smad3 and Smad2 in CypA and CypB –silenced  
926 cells after treatment or not with 1,5 ng/ml TGF $\beta$  for 3 h was detected by immunofluorescence  
927 using antibodies against total Smad3 and Smad2 (green).The nuclei were stained with Hoechst  
928 (blue). (I) The expression levels of Smad7, Smad6, Snon and BMP-2 in CypA- and CypB-  
929 silenced HK-2 cells treated with 1,5 ng/ml TGF $\beta$  for 24 h were analyzed by qPCR using specific  
930 probes indicated in supplemental materials. Student's t-test was used to compare shCon vs  
931 shCypA or shCon vs shCypB for control or TGF $\beta$  treated cells. \* P<0.05.

932

933 **Figure 3. Slug modulation by CypB is independent of the CD147 receptor and**  
934 **extracellular CypB.** Since extracellular CypA and CypB have been proposed as inflammatory  
935 mediators, we explored a potential autocrine loop in Cyp-mediated regulation of Slug and Snail.  
936 (A) NF $\kappa$ B activity was analyzed by cotransfecting cyclophilin-silenced HK-2 cells with plasmids  
937 containing the firefly luciferase gene under the NF $\kappa$ B promoter and the renilla luciferase gene



938 under the thymidine kinase promoter, plus a negative control empty plasmid pCMV-HA (empty)  
939 or the p65 subunit of NF $\kappa$ B (p65). NF $\kappa$ B activity was analyzed using a luciferase assay kit.  
940 Transfection efficiency was normalized by the value of cotransfected Renilla luciferase. (B) HK-  
941 2 cells were treated with 1,5 ng/ml TGF $\beta$  for the indicated times, and the presence of CypA and  
942 CypB in the extracellular medium was analyzed by western blot. Culture medium that has not  
943 been in contact with cells was used as a negative control. (C) HK-2 cells were treated with 1  $\mu$ M  
944 Brefeldin-A (Bf-A) for 30 minutes before addition of either 1,5 ng/ml TGF $\beta$  or 0,5  $\mu$ M  
945 Cyclosporine-A (CsA) for 3 hours. Extracellular media were then collected and analyzed by  
946 western blot. (D) HK-2 cells were treated with 1  $\mu$ M Brefeldin-A (Bf-A) for 30 minutes before  
947 addition of 1,5 ng/ml TGF $\beta$  and the expression levels of Slug and Snail and the phosphorylation  
948 status and expression levels of ERK1/2 analyzed by western blot. (E) HK-2 cells were stably  
949 silenced for CD147 as indicated in Methods, and treated or not with 1,5 ng/ml TGF $\beta$  for 3 hours  
950 before analyzing the levels of slug and snail and the the phosphorylation status and expression  
951 levels of Smad3 and Smad2. (F) Control and CypB-silenced HK-2 cells were treated with  
952 increasing doses of recombinant CypB for 3 h and the expression of Slug and Snail and the  
953 phosphorylation status and expression levels of ERK1/2 analyzed by western blot. Student's t-  
954 test was used to compare shCon vs shCypA or shCon vs shCypB for control or p65 transfected  
955 cells. \* P<0.05.

956

957 **Figure 4. Slug regulation by CypA and CypB depends on PPIase activity of CypA and ER**  
958 **location of CypB** shRNA-resistant wild-type (wt) or shRNA-resistant mutants defective in  
959 PPIase activity ( $\Delta$ PPI) or, in the case of CypB, its signal peptide ( $\Delta$ ER), were cloned into  
960 lentiviral expression vectors and reintroduced into CypA or CypB-silenced cells to discard off-  
961 targets effects of shRNA and to study the involvement of PPIase activity and ER location. (A)  
962 Schematic diagram summarizing the different mutations introduced in CypA and CypB  
963 expression vectors. (B) The expression levels of CypA wt and mutant forms reintroduced into  
964 CypA-silenced cells were determined by Western Blot.  $\emptyset$  corresponds to the empty expression  
965 vector. (C and D) Western Blot analysis showing that the increase in Slug and Snail levels  
966 observed in CypA-silenced cells is prevented by reintroducing HK-2 CypA wt but not the R55A  
967 mutant, either in untreated cells (C) or cells treated with 1,5 ng/ml TGF $\beta$  for 3 hours (D). (E) The

968 expression levels of CypB wt and mutant forms reintroduced into CypB-silenced cells were also  
969 analyzed Western Blot in cell extracts and cell supernatants (SN). Ø corresponds to the empty  
970 expression vector. (F) Immunofluorescence staining of reintroduced CypB wt and the ΔPPI and  
971 ΔER mutants of CypB. CypB wt and ΔPPI colocalized with the ER marker calnexin (CNX) while  
972 CypB ΔER did not. (G and H) Western Blot analysis of the expression levels of Slug and Snail,  
973 after reintroduction of CypB wt or ΔPPI and ΔER mutants, either in untreated cells (G) or in cells  
974 treated with 1,5 ng/ml TGFβ for 3 hours. Actin ratios are referred to control shRNA-treated cells  
975 for Slug and Snail.

976 **Figure 5. CypB could be modulating Slug levels through calcium regulating elements in**  
977 **the ER.** To explore whether the modulatory effects of CypB on Slug levels could be related to  
978 calreticulin (CRT) and calnexin (CNX), we analyzed CRT and CNX subcellular localization and  
979 protein interactions in HK-2 silenced cells. (A) Immunofluorescence staining of CRT (ER  
980 luminal) and CNX (ER transmembrane) was unaffected by either CypA or CypB silencing. (B)  
981 Wild type, PPIase and signal peptide defective mutants of CypB were re-introduced in CypB-  
982 silenced cells and immunoprecipitated with HA antibody, followed by immunoblotting with CRT,  
983 CNX, HA or CypB. (C) To explore if the changes in slug levels could be related to calcium  
984 homeostasis disturbance, HK-2 cells were treated with 5 μM thapsigargin or 1 μM Ionomycin for  
985 3 hours and Slug and Snail levels were analyzed by western blot. (D) HK-2 cells were treated  
986 with 5 μM thapsigargin or 1 μM Ionomycin for 30 minutes before addition of 1,5 ng/ml TGFβ for  
987 3 hours. (E) Control, CypA and CypB-silenced cells were treated with 1 μM Ionomycin for 3  
988 hours and Slug and Snail levels and the phosphorylation status and expression levels of  
989 ERK1/2 analyzed by western blot.

990

991 **Figure 6. CypB depletion ameliorates inflammation and fibrosis after UUO.** CypB KO mice  
992 were used to assess the involvement of CypB in kidney fibrosis. (A) The expression levels of  
993 CypB were analyzed by Western Blot in kidneys from CypB KO (CypB <sup>-/-</sup>) mice and control wild  
994 type littermates (wt). (B) Scheme depicting the experimental approach: CypB-KO mice and  
995 control littermates were subjected to unilateral ureteral obstruction as a model of renal fibrosis.  
996 Mice were sacrificed 7 days after obstruction and total RNA was extracted from the right  
997 contralateral kidneys (CL) and left obstructed kidneys (UUO). (C) Hematoxylin and eosin (H&E),



998 mouse macrophage marker F4/80, and Masson's trichrome (MT) staining of kidneys sections  
999 from contralateral kidneys (CL) and obstructed kidneys (UUO) of wt and CypB KO mice. (D)  
1000 CypB, MCP1, CD68, TNF $\alpha$  and CypA mRNA levels detected by qRT-PCR. (E) Fibronectin,  
1001 collagen-1a, MMP9, TGF $\beta$ , E-cadherin, CD147, snail, slug, Smad7, BMP-7, and BMP-6 levels  
1002 detected by qRT-PCR. Each column shows mean  $\pm$  SEM; n = 8 animals per group. Data were  
1003 analyzed by two-way analysis of variance (ANOVA) followed by Tukey multiple comparison test.  
1004 ns  $P \geq 0.05$ ; \*  $P < 0.05$ , \*\*  $P < 0.01$ , \*\*\*  $P < 0.001$ ; \*\*\*\* $P < 0.0001$ .

1005

1006 **Figure S1. CypB and CypA silencing differentially affects epithelial phenotype of RPTEC.**

1007 To validate the results observed in HK-2 cells, we silenced CypA and CypB in the human  
1008 proximal tubule derived cell line RPTEC (#CRL-4031, ATCC). Western Blot shows the decrease  
1009 in CypA and CypB expression in RPTEC cells stably transfected with shRNA-expressing  
1010 lentiviral vectors against CypA or CypB, respectively. The expression levels of the epithelial  
1011 markers E-cadherin and occludin and those of the transcriptional repressors Snail and Slug at 5  
1012 days of culture were also analyzed by western blot.

1013 **Supplemental Material**

1014

1015 Table S1. Antibodies (in alphabetical order)

| <b>Antibody</b>               | <b>Reference</b>                    |
|-------------------------------|-------------------------------------|
| Actin                         | # A5060; Sigma-Aldrich              |
| Calnexin                      | # MA3-027, Thermo Fisher            |
| Calreticulin                  | # 12238; Cell Signaling             |
| CD147                         | # 376-820 (UM-8D6); Ansell          |
| Cyclophilin A                 | # 07-313; Millipore                 |
| Cyclophilin B                 | # PA1-027A; Thermo Scientific       |
| E-cadherin                    | # 610181; BD Transduction Labs      |
| ERK1/2                        | # 06-182; Merck-Millipore           |
| ERK1/2 (Thr202/204) phosphate | # 9101; Cell Signaling              |
| Fibronectin                   | # F6140; Sigma-Aldrich              |
| GAPDH                         | # MA5-15738, Thermo Fisher          |
| HA                            | # 1867423; Roche                    |
| N-cadherin                    | # 610920; BD Transduction Labs      |
| Occludin                      | # 71-1500; Invitrogen               |
| Pan-Cytokeratin (AE1/AE3)     | Dako (Agilent)                      |
| Slug                          | # 9585; Cell Signaling              |
| Smad2                         | # 5339; Cell Signaling              |
| Smad2 (Ser465/467) phosphate  | # 3108; Cell Signaling              |
| Smad3                         | # 9523; Cell Signaling              |
| Smad3 (Ser423/425) phosphate  | # 9520; Cell Signaling              |
| Smad4                         | # Sc-7966; Santa Cruz Biotechnology |
| Snail                         | # 3895; Cell Signaling              |
| ZO-1                          | # 61-7300; Invitrogen               |

1016

1017

1018 Table S2. Taqman Probes (in alphabetical order)

| Specie | Gene Symbol           | Gene Name                                   | Reference      |
|--------|-----------------------|---------------------------------------------|----------------|
| Human  | BMP2                  | bone morphogenetic protein 2                | Hs00154192_m1  |
|        | CDH1                  | cadherin 1, type 1, E-cadherin (epithelial) | Hs01023894_m1  |
|        | CDH2                  | cadherin 2, type 1, N-cadherin (neuronal)   | Hs00983056_m1  |
|        | KRT8                  | keratin 8                                   | Hs01670053_m1  |
|        | OCLN                  | occludin                                    | Hs00170162_m1  |
|        | SKIL                  | SKI-like oncogene                           | Hs01045418_m1  |
|        | SMAD6                 | SMAD family member 6                        | Hs00178579_m1  |
|        | SMAD7                 | SMAD family member 7                        | Hs00998193_m1  |
|        | SNAI1                 | snail family zinc finger 1                  | Hs00195591_m1  |
|        | SNAI2                 | snail family zinc finger 2                  | Hs00950344_m1  |
|        | TWIST1                | twist family bHLH transcription factor 1    | Hs00361186_m1  |
|        | ZEB1                  | zinc finger E-box binding homeobox 1        | Hs00611024_m1  |
| Mouse  | BMP6                  | bone morphogenetic protein 6                | Mm01332882_m1  |
|        | BMP7                  | bone morphogenetic protein 7                | Mm00432102_m1  |
|        | BSG                   | basigin CD147                               | Mm0116115_m1   |
|        | CCL2                  | chemokine (C-C motif) ligand 2              | Mm 00441242_m1 |
|        | CD68                  | CD68 antigen                                | Mm 03047340_m1 |
|        | CDH1                  | cadherin 1                                  | Mm 01247357_m1 |
|        | COL1A2                | collagen, type I, alpha 2                   | Mm00483888_m1  |
|        | FN1                   | fibronectin                                 | Mm01256744_m1  |
|        | MMP9                  | matrix metalloproteinase 9                  | Mm00442991_m1  |
|        | PPIA                  | peptidylprolyl isomerase A                  | Mm02342430_g1  |
|        | PPIB                  | peptidylprolyl isomerase B                  | Mm00478295_m1  |
|        | SMAD7                 | SMAD family member 7                        | Mm00484742_m1  |
|        | SNAI1                 | snail family zinc finger 1                  | Mm00441533_g1  |
|        | SNAI2                 | snail family zinc finger 2                  | Mm00441531_m1  |
|        | TGFbeta1              | transforming growth factor, beta 1          | Mm01178820_m1  |
| TNF    | tumor necrosis factor | Mm00443258_m1                               |                |

1019

1020

1021

1022 Table S3. shRNA sequences

| Gene                  | Localization   | Sequence                                             |
|-----------------------|----------------|------------------------------------------------------|
| hCypA                 | 3'UTR          | TGGATTGCAGAGTTAAGTTTA                                |
| hCypB                 | CDS 149 to 170 | GCCGGGTGATCTTTGGTCTCTT                               |
| control non-targeting |                | TCTCGCTTGGGCGAGAGTAAG                                |
| hCD147                | 3'UTR          | CCCATCATACACTTCCTTCTTCTCGAGAAGAAGGAA<br>GTGTATGATGGG |

1023

1024

Figure 1

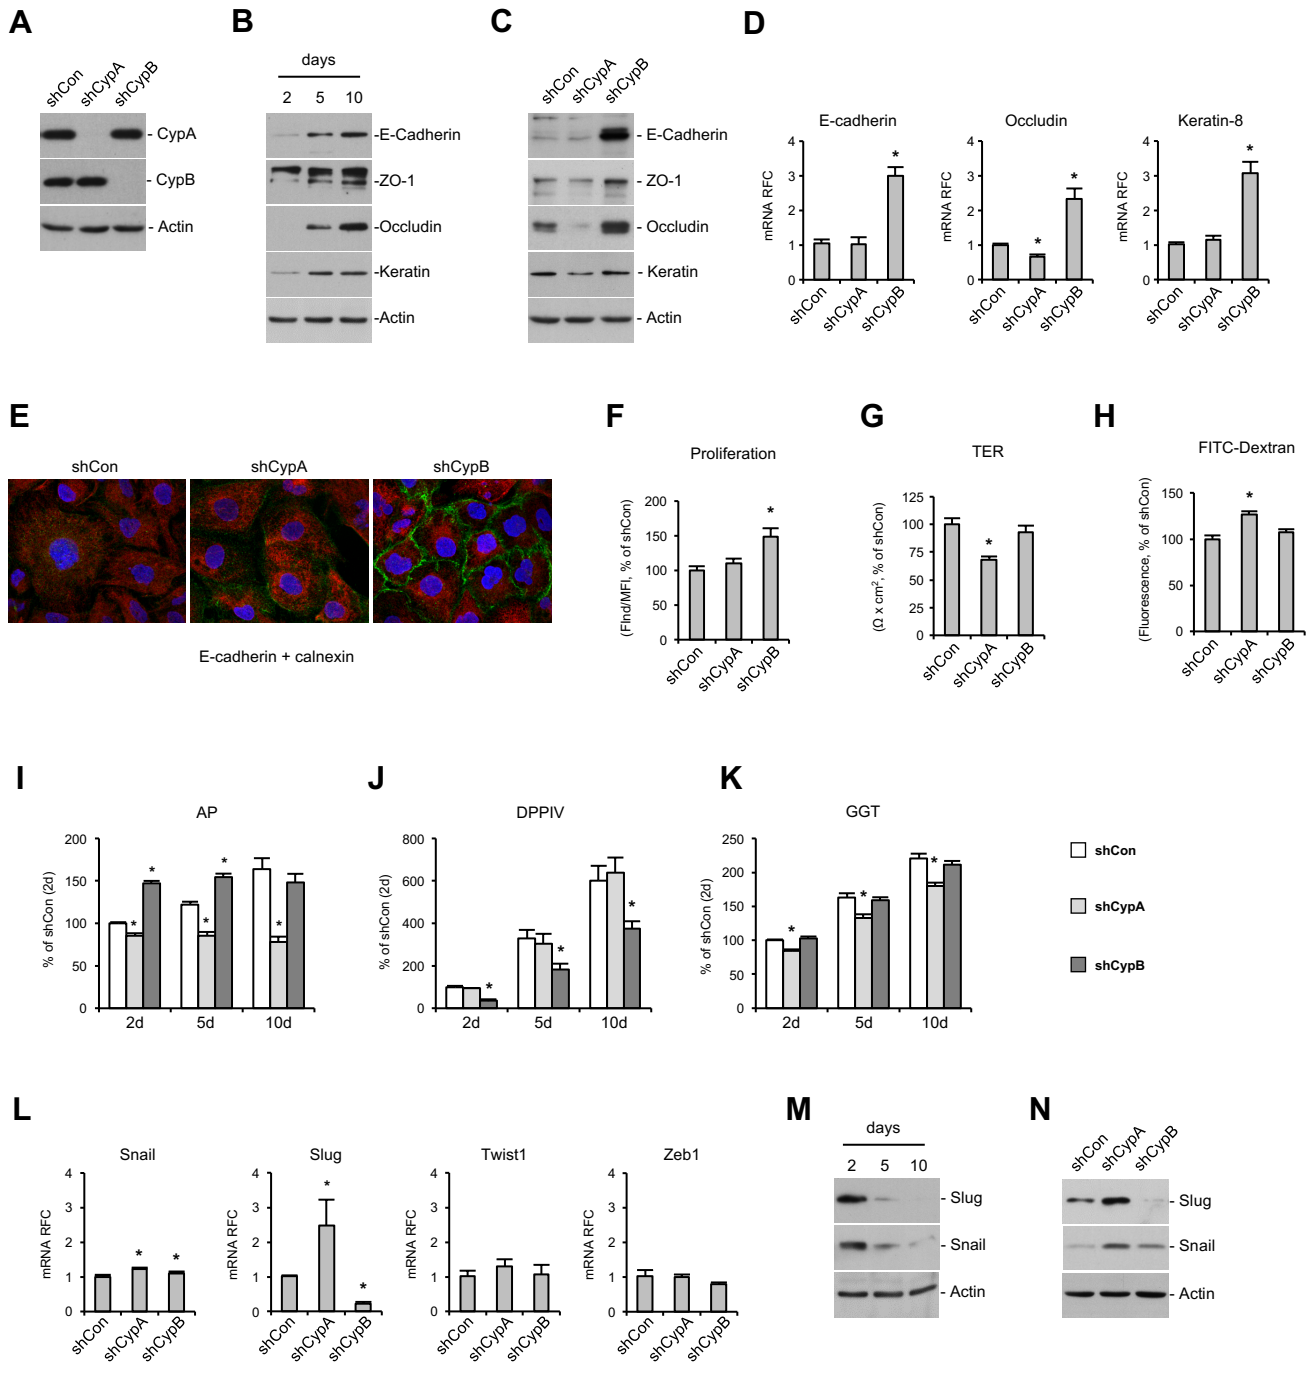

**Figure 2**

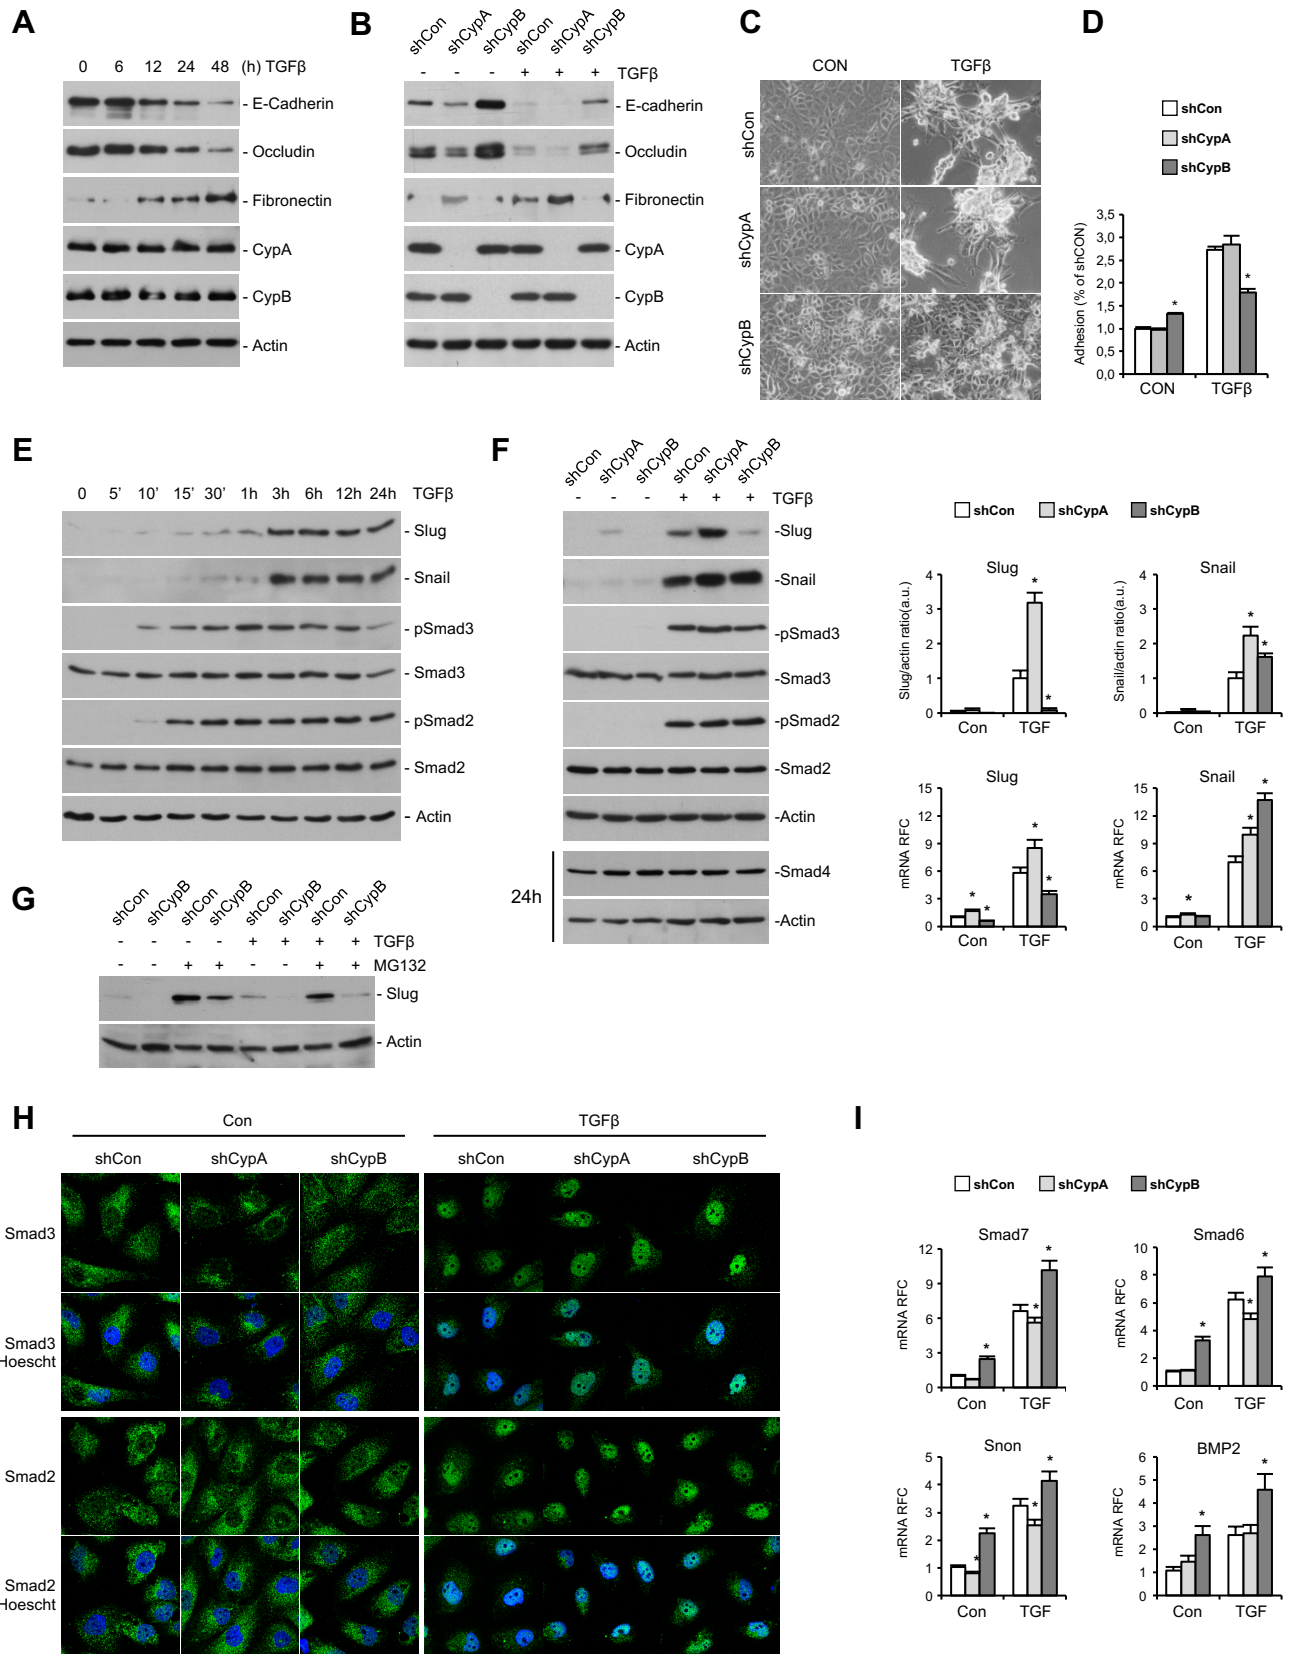

Figure 3

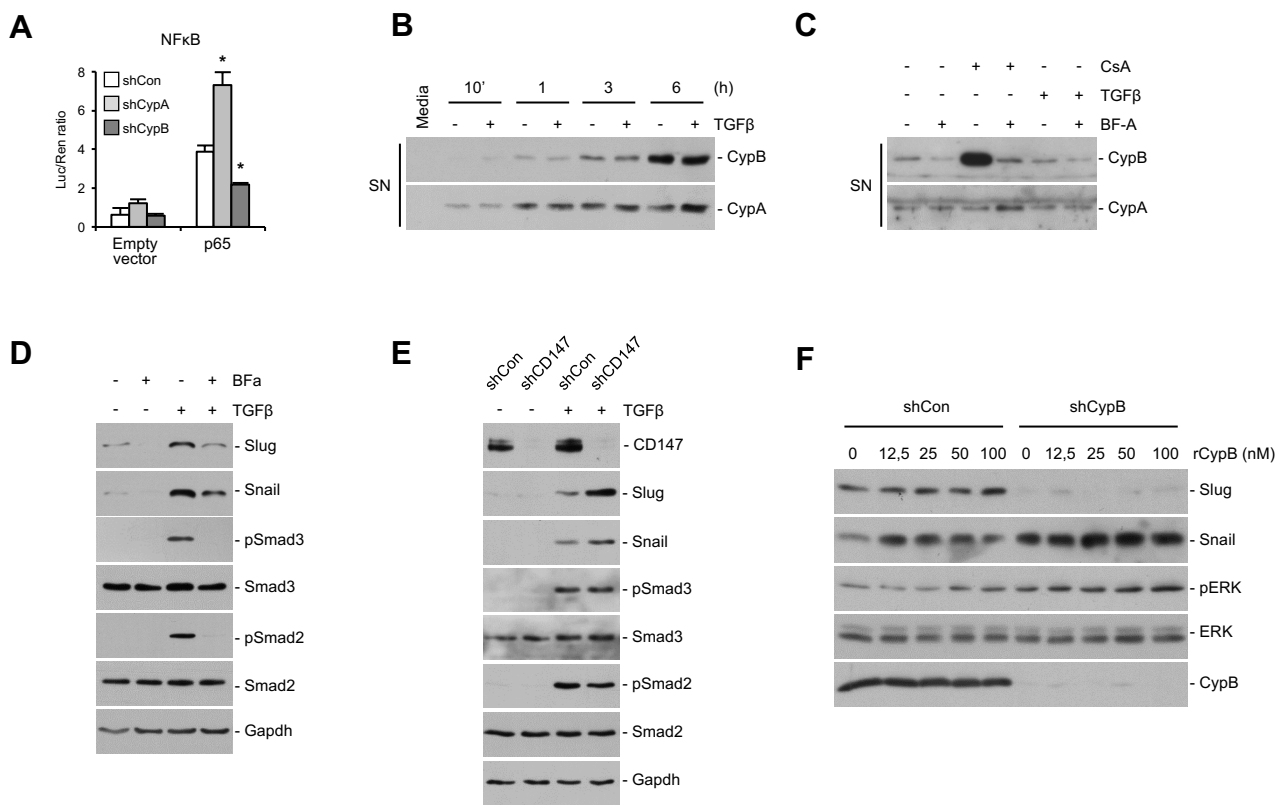

Figure 4

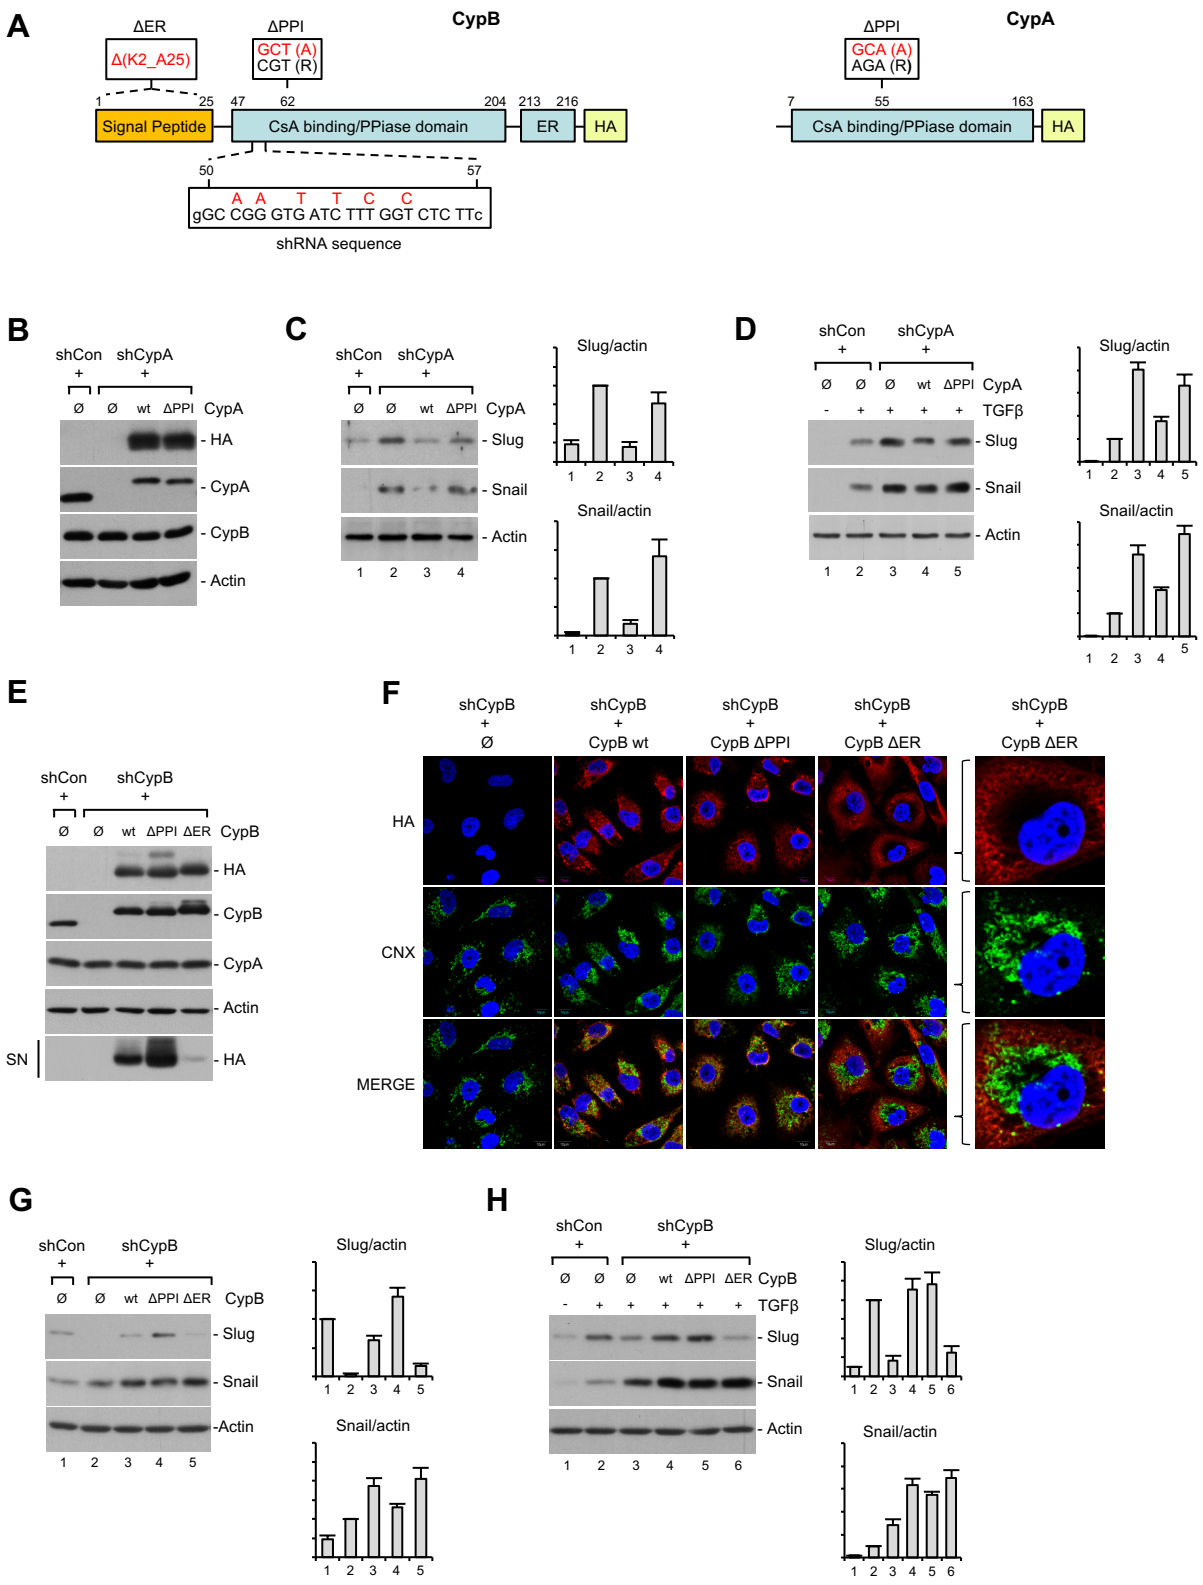



Figure 5

**A**

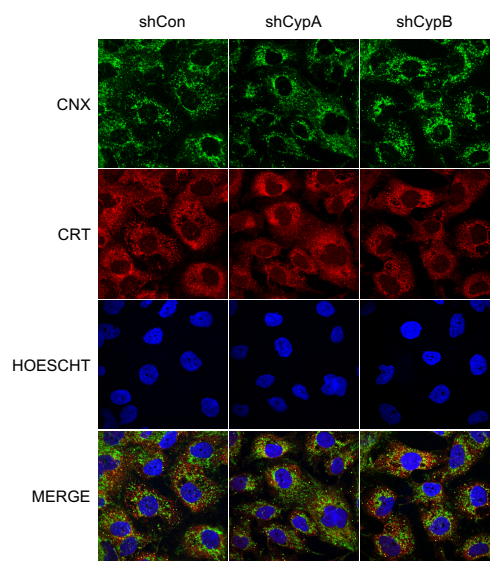

**B**

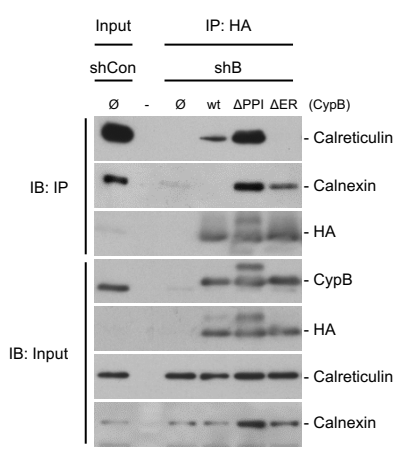

**C**

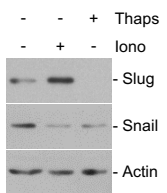

**D**

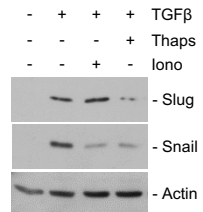

**E**

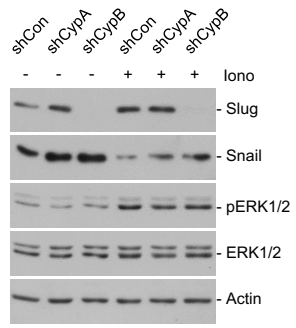

Figure 6

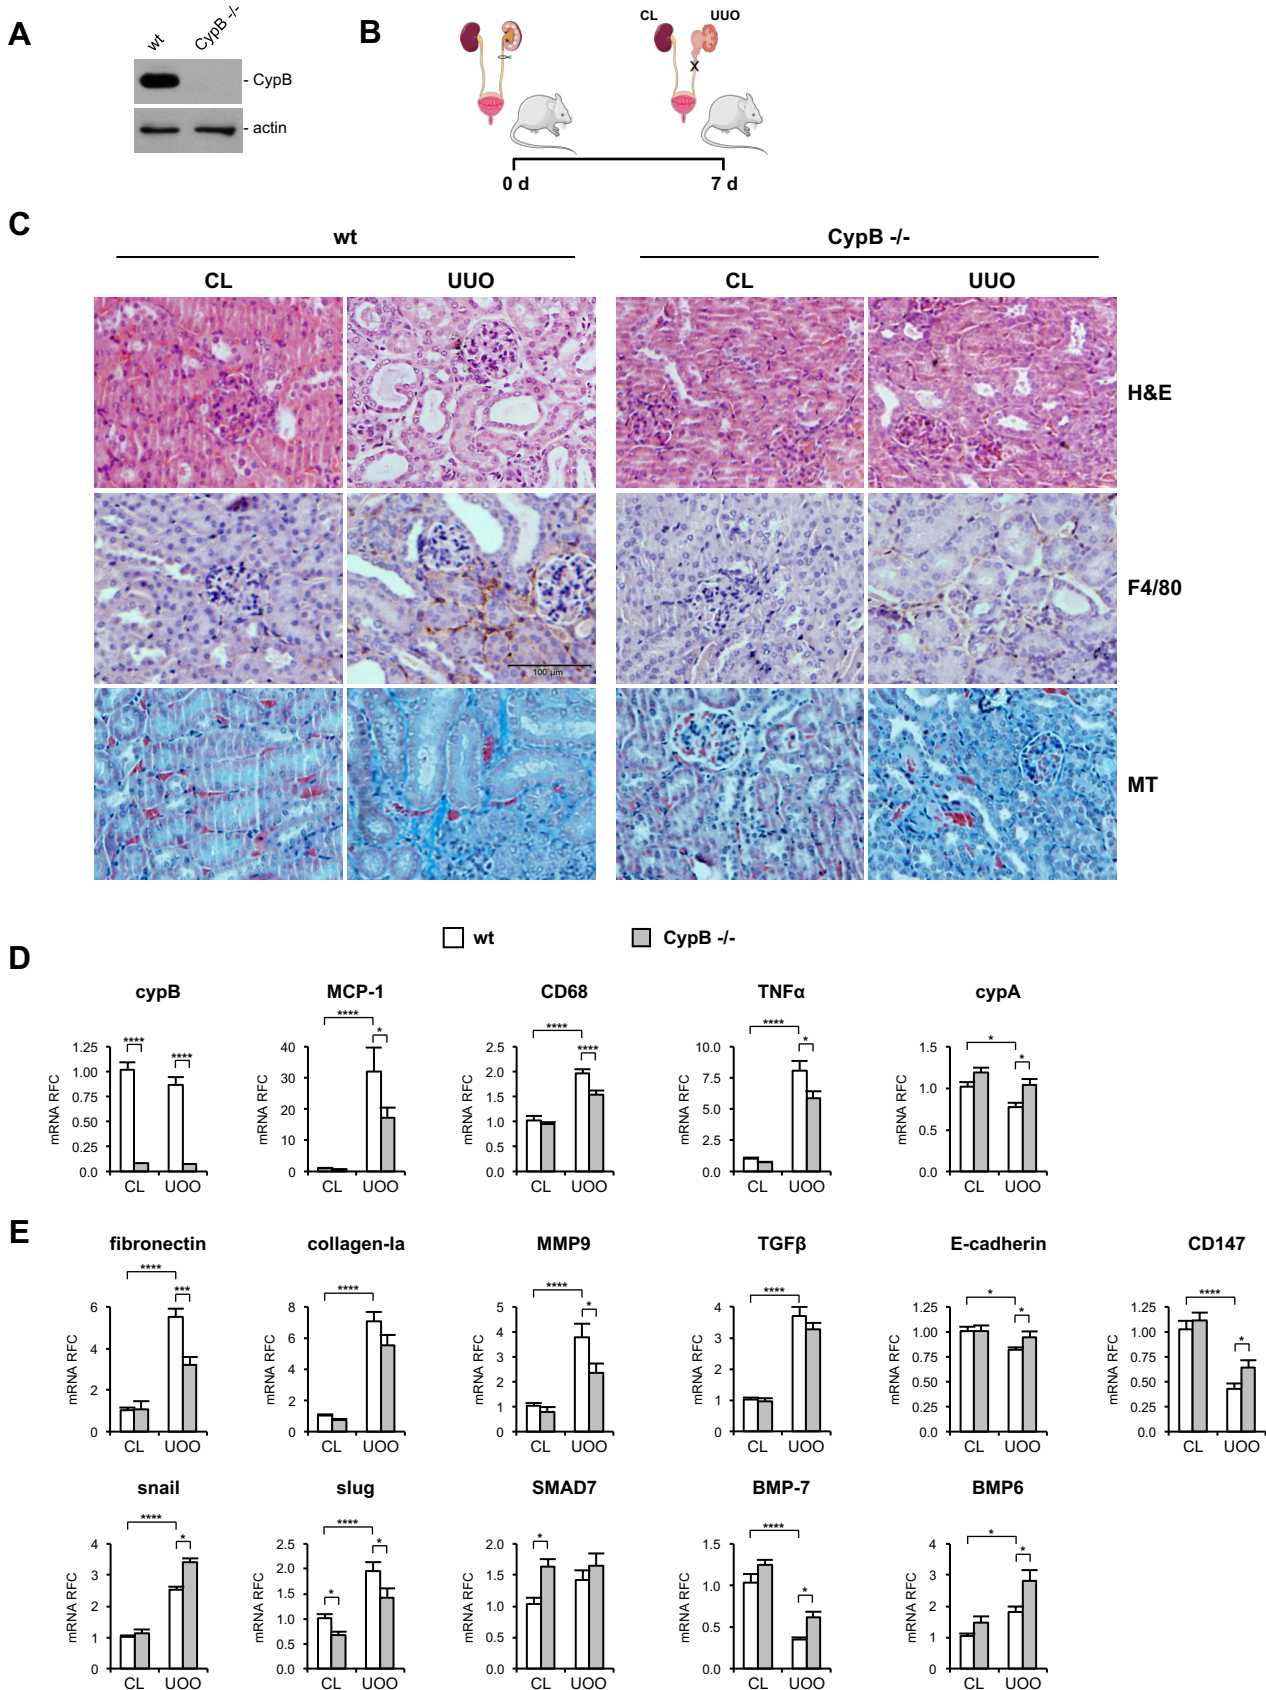

# Figure Supp1 (RPTEC)

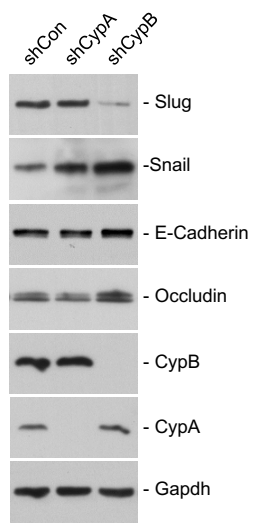

Source: https://www.biorxiv.org/content/10.1101/288886v1.full.pdf
